# Supplementary material for: Subgroup-Elimination Transcriptomics Identifies Signaling Proteins that Define Subclasses of TRPV1-Positive Neurons and a Novel Paracrine Circuit
Source: PLoS One. 2014 Dec 31;9(12):e115731. doi: 10.1371/journal.pone.0115731 (PMC4281118; doi:10.1371/journal.pone.0115731)
Supplement: S6 Table — Overlap of genes detected by with higher expression levels within the TRPV1(+) subgroup and databases such as the Pain Networks database [35] and Pain Genes database [36] as well as with a genome-wide Drosophila screen for genes involved in heat nociception [37] . (XLSX) [file pone.0115731.s008.xlsx]

## Sheet: Table_S6 Pain Networks
Ensembl Gene ID	Associated Gene Name	Description
ENSRNOG00000001130	Nos1	nitric oxide synthase 1, neuronal (Nos1), mRNA
ENSRNOG00000001575	Grik1	glutamate receptor, ionotropic, kainate 1 (Grik1), transcript variant 2, mRNA
ENSRNOG00000002229	Adcy5	adenylate cyclase 5 (Adcy5), mRNA
ENSRNOG00000002653	Kcnk2	potassium channel, subfamily K, member 2 (Kcnk2), transcript variant 2, mRNA
ENSRNOG00000002773	Rgs4	regulator of G-protein signaling 4 (Rgs4), mRNA
ENSRNOG00000002863	Cacna1e	calcium channel, voltage-dependent, R type, alpha 1E subunit (Cacna1e), mRNA
ENSRNOG00000007374	Tac1	tachykinin, precursor 1 (Tac1), transcript variant 1, mRNA
ENSRNOG00000007647	Oprk1	opioid receptor, kappa 1 (Oprk1), mRNA
ENSRNOG00000008428	DRD2	D(2) dopamine receptor
ENSRNOG00000008552	P2RX3	purinergic receptor P2X, ligand-gated ion channel, 3 (P2rx3), transcript variant 1, mRNA
ENSRNOG00000010325	Ptger3	prostaglandin E receptor 3 (subtype EP3) (Ptger3), mRNA
ENSRNOG00000011071	Nt5e	5' nucleotidase, ecto (Nt5e), mRNA
ENSRNOG00000011130	Calca	calcitonin-related polypeptide alpha (Calca), transcript variant 3, mRNA
ENSRNOG00000011820	Acpp	acid phosphatase, prostate (Acpp), transcript variant 1, mRNA
ENSRNOG00000012417	Iapp	islet amyloid polypeptide (Iapp), mRNA
ENSRNOG00000014010	Gfra2	GDNF family receptor alpha 2 (Gfra2), mRNA
ENSRNOG00000014149	Npy1r	neuropeptide Y receptor Y1 (Npy1r), mRNA
ENSRNOG00000014183	Gnaq	guanine nucleotide binding protein (G protein), q polypeptide (Gnaq), mRNA
ENSRNOG00000015156	Gal	galanin/GMAP prepropeptide (Gal), mRNA
ENSRNOG00000015260	Lpar3	lysophosphatidic acid receptor 3 (Lpar3), mRNA
ENSRNOG00000016756	Ptgir	prostaglandin I2 (prostacyclin) receptor (IP) (Ptgir), mRNA
ENSRNOG00000019486	Trpv1	transient receptor potential cation channel, subfamily V, member 1 (Trpv1), mRNA
ENSRNOG00000021150	Plcb3	phospholipase C, beta 3 (phosphatidylinositol-specific) (Plcb3), mRNA
ENSRNOG00000032706	Kcnk18	potassium channel, subfamily K, member 18 (Kcnk18), transcript variant 2, mRNA
ENSRNOG00000032884	Scn11a	sodium channel, voltage-gated, type XI, alpha subunit (Scn11a), mRNA
ENSRNOG00000033796	Kcnj5	potassium inwardly-rectifying channel, subfamily J, member 5 (Kcnj5), mRNA
ENSRNOG00000049882	Adcyap1	adenylate cyclase activating polypeptide 1 (Adcyap1), mRNA

## Sheet: Table_S6  Pain Genes 
Ensembl Gene ID	Associated Gene Name	Description
ENSRNOG00000001130	Nos1	nitric oxide synthase 1, neuronal (Nos1), mRNA
ENSRNOG00000002229	Adcy5	adenylate cyclase 5 (Adcy5), mRNA
ENSRNOG00000002653	Kcnk2	potassium channel, subfamily K, member 2 (Kcnk2), transcript variant 2, mRNA
ENSRNOG00000002773	Rgs4	regulator of G-protein signaling 4 (Rgs4), mRNA
ENSRNOG00000007374	Tac1	tachykinin, precursor 1 (Tac1), transcript variant 1, mRNA
ENSRNOG00000007647	Oprk1	opioid receptor, kappa 1 (Oprk1), mRNA
ENSRNOG00000008428	DRD2	D(2) dopamine receptor
ENSRNOG00000008552	P2RX3	purinergic receptor P2X, ligand-gated ion channel, 3 (P2rx3), transcript variant 1, mRNA
ENSRNOG00000009407	Galr2	galanin receptor 2 (Galr2), mRNA
ENSRNOG00000010325	Ptger3	prostaglandin E receptor 3 (subtype EP3) (Ptger3), mRNA
ENSRNOG00000011130	Calca	calcitonin-related polypeptide alpha (Calca), transcript variant 3, mRNA
ENSRNOG00000011820	Acpp	acid phosphatase, prostate (Acpp), transcript variant 1, mRNA
ENSRNOG00000012417	Iapp	islet amyloid polypeptide (Iapp), mRNA
ENSRNOG00000014010	Gfra2	GDNF family receptor alpha 2 (Gfra2), mRNA
ENSRNOG00000014183	Gnaq	guanine nucleotide binding protein (G protein), q polypeptide (Gnaq), mRNA
ENSRNOG00000015156	Gal	galanin/GMAP prepropeptide (Gal), mRNA
ENSRNOG00000015260	Lpar3	lysophosphatidic acid receptor 3 (Lpar3), mRNA
ENSRNOG00000016756	Ptgir	prostaglandin I2 (prostacyclin) receptor (IP) (Ptgir), mRNA
ENSRNOG00000018712	CAMK2A	Uncharacterized protein
ENSRNOG00000019486	Trpv1	transient receptor potential cation channel, subfamily V, member 1 (Trpv1), mRNA
ENSRNOG00000020478	Camk4	calcium/calmodulin-dependent protein kinase IV (Camk4), mRNA
ENSRNOG00000021150	Plcb3	phospholipase C, beta 3 (phosphatidylinositol-specific) (Plcb3), mRNA
ENSRNOG00000031307		Uncharacterized protein
ENSRNOG00000031535	Ptgdr	prostaglandin D2 receptor (Ptgdrl), mRNA
ENSRNOG00000032706	Kcnk18	potassium channel, subfamily K, member 18 (Kcnk18), transcript variant 2, mRNA
ENSRNOG00000032884	Scn11a	sodium channel, voltage-gated, type XI, alpha subunit (Scn11a), mRNA
ENSRNOG00000033531	Cacna2d1	calcium channel, voltage-dependent, alpha2/delta subunit 1 (Cacna2d1), transcript variant 1, mRNA
ENSRNOG00000046731	Cacna1a	voltage-dependent P/Q-type calcium channel subunit alpha-1A
ENSRNOG00000049882	Adcyap1	adenylate cyclase activating polypeptide 1 (Adcyap1), mRNA
ENSRNOG00000050358	Galr2	galanin receptor 2 (Galr2), mRNA
	Adrbk2

## Sheet: Table_S6  Fly Heat Pain
Ensembl Gene ID	Associated Gene Name	Description
ENSRNOG00000005365	Kcnip1	Kv channel-interacting protein 1 (Kcnip1), transcript variant 3, mRNA
ENSRNOG00000010597	Slc5a7	solute carrier family 5 (sodium/choline cotransporter), member 7 (Slc5a7), mRNA
ENSRNOG00000018018	Kcnip2	Kv channel-interacting protein 2 (Kcnip2), transcript variant b, mRNA
ENSRNOG00000019486	Trpv1	transient receptor potential cation channel, subfamily V, member 1 (Trpv1), mRNA
ENSRNOG00000032350	Kcnip4	Kv channel interacting protein 4 (Kcnip4), mRNA
ENSRNOG00000050358	Galr2	galanin receptor 2 (Galr2), mRNA
