# Supplementary material for: Subgroup-Elimination Transcriptomics Identifies Signaling Proteins that Define Subclasses of TRPV1-Positive Neurons and a Novel Paracrine Circuit
Source: PLoS One. 2014 Dec 31;9(12):e115731. doi: 10.1371/journal.pone.0115731 (PMC4281118; doi:10.1371/journal.pone.0115731)
Supplement: S7 Table — Overrepresented Gene Ontology (GO) terms, Kegg pathways, and Interpro protein domains with the TRPV1-associated genes detected using microarrays and/or RNA-Seq. The analysis was performed with DAVID [38]. (XLSX) [file pone.0115731.s009.xlsx]

## Sheet: S7 TRPV1(+) GO
Category	Term	Description	Count	%	PValue	Genes	List Total	Pop Hits	Pop Total	Fold Enrichment	Bonferroni	Benjamini	FDR
GOTERM_MF_FAT	GO:0005261	cation channel activity	22	10.2804	2.526e-12	TRPC4, KCNC4, CACNA2D1, TRPC3, GRIK1, TRPV1, KCNK18, KCNA3, KCNIP2, KCNIP1, KCNK2, KCNIP4, KCNMB2, KCNJ5, KCNT1, P2RX3, KCNH6, CACNA1E, SCN11A, CHRNA6, CHRNE, KCNE3	147	249	11963	7.19028	8.91671e-10	8.91671e-10	3.45911e-09
GOTERM_MF_FAT	GO:0046873	metal ion transmembrane transporter activity	23	10.7477	8.54027e-12	TRPC4, KCNC4, CACNA2D1, TRPC3, GRIK1, TRPV1, KCNK18, KCNA3, KCNIP2, KCNIP1, KCNK2, KCNIP4, KCNMB2, KCNJ5, KCNT1, P2RX3, KCNH6, CACNA1E, SCN11A, CHRNA6, CHRNE, SLC39A3, KCNE3	147	295	11963	6.34496	3.01472e-09	1.50736e-09	1.16952e-08
GOTERM_MF_FAT	GO:0005216	ion channel activity	24	11.215	1.59017e-11	FXYD2, TRPC4, KCNC4, CACNA2D1, TRPC3, GRIK1, TRPV1, GRIK3, KCNK18, KCNA3, KCNIP2, KCNIP1, KCNK2, KCNIP4, KCNMB2, KCNJ5, KCNT1, P2RX3, KCNH6, CACNA1E, SCN11A, CHRNA6, CHRNE, KCNE3	147	336	11963	5.81293	5.61331e-09	1.8711e-09	2.1776e-08
GOTERM_MF_FAT	GO:0022838	substrate specific channel activity	24	11.215	2.88636e-11	FXYD2, TRPC4, KCNC4, CACNA2D1, TRPC3, GRIK1, TRPV1, GRIK3, KCNK18, KCNA3, KCNIP2, KCNIP1, KCNK2, KCNIP4, KCNMB2, KCNJ5, KCNT1, P2RX3, KCNH6, CACNA1E, SCN11A, CHRNA6, CHRNE, KCNE3	147	346	11963	5.64492	1.01888e-08	2.54721e-09	3.95262e-08
GOTERM_MF_FAT	GO:0022803	passive transmembrane transporter activity	24	11.215	6.07628e-11	FXYD2, TRPC4, KCNC4, CACNA2D1, TRPC3, GRIK1, TRPV1, GRIK3, KCNK18, KCNA3, KCNIP2, KCNIP1, KCNK2, KCNIP4, KCNMB2, KCNJ5, KCNT1, P2RX3, KCNH6, CACNA1E, SCN11A, CHRNA6, CHRNE, KCNE3	147	359	11963	5.44051	2.14493e-08	4.28986e-09	8.32095e-08
GOTERM_MF_FAT	GO:0015267	channel activity	24	11.215	6.07628e-11	FXYD2, TRPC4, KCNC4, CACNA2D1, TRPC3, GRIK1, TRPV1, GRIK3, KCNK18, KCNA3, KCNIP2, KCNIP1, KCNK2, KCNIP4, KCNMB2, KCNJ5, KCNT1, P2RX3, KCNH6, CACNA1E, SCN11A, CHRNA6, CHRNE, KCNE3	147	359	11963	5.44051	2.14493e-08	4.28986e-09	8.32095e-08
GOTERM_BP_FAT	GO:0006811	ion transport	32	14.9533	2.12376e-10	CLDN16, FXYD2, KCNC4, GRIK1, DRD2, TRPV1, GRIK3, KCNK18, KCNA3, KCNIP2, KCNIP1, KCNIP4, KCNMB2, CHRNA6, CAMK2A, SLC39A3, KCNE3, TRPC4, CACNA2D1, PTGER3, TRPC3, SLCO1A5, KCNK2, ATP13A4, KCNJ5, KCNT1, P2RX3, KCNH6, CACNA1E, SCN11A, SLC5A7, CHRNE	154	668	12092	3.76141	2.96052e-07	2.96052e-07	3.49742e-07
GOTERM_CC_FAT	GO:0005886	plasma membrane	68	31.7757	3.37618e-10	GNA14, KCNC4, LZTS1, CADM1, GRIK1, TRPV1, GRIK3, ADCY5, LPAR3, SYT9, KCNIP2, KCNIP1, KCNIP4, PTGIR, GALR2, CHRNA6, NT5E, DDAH1, TMEFF1, PTGER3, RXFP1, MRGPRD, PTPRT, PTPRU, AMIGO2, KCNT1, GNAQ, SSTR1, PTGDR, KCNH6, TNNI3K, DSP, EFNA5, SCN11A, GNB4, CLDN16, FXYD2, RAB3B, DRD2, C6, OPRK1, TAC1, KCNA3, CLDN10, CD72, KCNMB2, SYNPR, GPR27, IPCEF1, INPP5D, CAMK2A, CACNA2D1, TRPC4, NOS1, TRPC3, DPYSL3, …	149	2396	10776	2.05255	6.31346e-08	6.31346e-08	4.18509e-07
GOTERM_MF_FAT	GO:0022836	gated channel activity	20	9.34579	6.40335e-10	KCNC4, CACNA2D1, GRIK1, GRIK3, KCNK18, KCNA3, KCNIP2, KCNIP1, KCNK2, KCNIP4, KCNMB2, KCNJ5, KCNT1, P2RX3, KCNH6, CACNA1E, SCN11A, CHRNA6, CHRNE, KCNE3	147	269	11963	6.05063	2.26038e-07	3.7673e-08	8.76884e-07
GOTERM_BP_FAT	GO:0030001	metal ion transport	24	11.215	1.26792e-09	CLDN16, FXYD2, TRPC4, KCNC4, CACNA2D1, TRPC3, DRD2, TRPV1, KCNK18, KCNA3, KCNIP2, KCNIP1, KCNK2, KCNIP4, KCNMB2, KCNJ5, KCNT1, KCNH6, SCN11A, CACNA1E, SLC5A7, SLC39A3, CAMK2A, KCNE3	154	403	12092	4.6761	1.76748e-06	8.83739e-07	2.08801e-06
GOTERM_BP_FAT	GO:0006812	cation transport	26	12.1495	2.47564e-09	CLDN16, FXYD2, KCNC4, DRD2, TRPV1, KCNK18, KCNA3, KCNIP2, KCNIP1, KCNIP4, KCNMB2, CAMK2A, SLC39A3, KCNE3, TRPC4, CACNA2D1, TRPC3, KCNK2, ATP13A4, KCNJ5, KCNT1, P2RX3, KCNH6, CACNA1E, SCN11A, SLC5A7	154	492	12092	4.1494	3.45103e-06	1.15035e-06	4.07689e-06
GOTERM_MF_FAT	GO:0005267	potassium channel activity	12	5.60748	2.28035e-07	KCNJ5, KCNC4, KCNT1, KCNK18, KCNH6, KCNA3, KCNIP2, KCNIP1, KCNK2, KCNE3, KCNIP4, KCNMB2	147	120	11963	8.1381	8.0493e-05	1.14994e-05	0.000312274
GOTERM_BP_FAT	GO:0006813	potassium ion transport	13	6.07477	2.31296e-07	FXYD2, KCNC4, KCNK18, KCNA3, KCNIP2, KCNK2, KCNIP1, KCNIP4, KCNMB2, KCNJ5, KCNT1, KCNH6, KCNE3	154	142	12092	7.1884	0.000322374	8.06033e-05	0.000380898
GOTERM_MF_FAT	GO:0030955	potassium ion binding	11	5.14019	8.18402e-07	KCNJ5, FXYD2, KCNC4, KCNT1, KCNK18, KCNH6, KCNA3, KCNIP2, KCNIP1, KCNE3, KCNIP4	147	109	11963	8.21276	0.000288854	3.61114e-05	0.00112073
GOTERM_MF_FAT	GO:0005244	voltage-gated ion channel activity	13	6.07477	1.15871e-06	KCNC4, CACNA2D1, GRIK1, KCNA3, KCNIP2, KCNK2, KCNIP1, KCNIP4, KCNJ5, KCNH6, CACNA1E, SCN11A, KCNE3	147	171	11963	6.18686	0.000408941	4.54461e-05	0.00158674
GOTERM_MF_FAT	GO:0022832	voltage-gated channel activity	13	6.07477	1.15871e-06	KCNC4, CACNA2D1, GRIK1, KCNA3, KCNIP2, KCNK2, KCNIP1, KCNIP4, KCNJ5, KCNH6, CACNA1E, SCN11A, KCNE3	147	171	11963	6.18686	0.000408941	4.54461e-05	0.00158674
GOTERM_CC_FAT	GO:0005887	integral to plasma membrane	19	8.8785	1.82532e-06	FXYD2, KCNC4, TRPC4, TRPC3, GRIK1, DRD2, GRIK3, C6, KCNA3, KCNIP2, CD72, KCNK2, SLCO1A5, KCNMB2, AMIGO2, KCNH6, SCN11A, CHRNA6, CHRNE	149	357	10776	3.84908	0.000341277	0.000170653	0.00226263
GOTERM_BP_FAT	GO:0051046	regulation of secretion	15	7.00935	2.66037e-06	RAB3B, NOS1, GRIK1, CADM1, DRD2, NNAT, TAC1, SYT9, NPY1R, NPY5R, CRH, CARTPT, CHRNA6, RAB27B, CAMK2A	154	245	12092	4.80732	0.00370169	0.000741436	0.00438101
GOTERM_MF_FAT	GO:0031420	alkali metal ion binding	13	6.07477	3.3176e-06	FXYD2, KCNC4, KCNK18, KCNA3, KCNIP2, KCNIP1, KCNIP4, KCNJ5, KCNT1, KCNH6, SCN11A, SLC5A7, KCNE3	147	189	11963	5.59763	0.00117043	0.000117105	0.00454307
GOTERM_CC_FAT	GO:0031226	intrinsic to plasma membrane	19	8.8785	4.74133e-06	FXYD2, KCNC4, TRPC4, TRPC3, GRIK1, DRD2, GRIK3, C6, KCNA3, KCNIP2, CD72, KCNK2, SLCO1A5, KCNMB2, AMIGO2, KCNH6, SCN11A, CHRNA6, CHRNE	149	382	10776	3.59717	0.000886237	0.0002955	0.00587716
GOTERM_BP_FAT	GO:0051241	negative regulation of multicellular organismal process	12	5.60748	5.05994e-06	CALCA, NOS1, GRIK1, IAPP, DRD2, GRIK3, TAC1, CARTPT, MSTN, TSPAN8, INPP5D, NPY5R	154	158	12092	5.9635	0.00702876	0.00117491	0.00833241
GOTERM_BP_FAT	GO:0055082	cellular chemical homeostasis	18	8.41121	5.18143e-06	PTGER3, GRIK1, DRD2, GRIK3, TAC1, LPAR3, NPY1R, KCNIP1, KCNMB2, CALCA, GNAQ, P2RX3, GALR2, CARTPT, GNB4, CHRNA6, CHRNE, MT3	154	375	12092	3.76894	0.00719691	0.00103132	0.00853247
GOTERM_BP_FAT	GO:0007631	feeding behavior	9	4.20561	5.49824e-06	CALCA, IAPP, DRD2, CRH, CARTPT, NPY1R, GAL, TCF15, NPY5R	154	77	12092	9.1776	0.00763528	0.000957613	0.00905415
GOTERM_CC_FAT	GO:0043005	neuron projection	20	9.34579	7.84659e-06	LZTS1, NOS1, GRIK1, CADM1, DRD2, TRPV1, CPNE5, GRIK3, ADRBK2, TAC1, DPYSL3, NPY1R, KCNIP2, VGF, KCNIP1, KLHL1, ADCYAP1, CALCA, P2RX3, CAMK2A	149	436	10776	3.31753	0.00146624	0.000366762	0.00972615
GOTERM_BP_FAT	GO:0048878	chemical homeostasis	20	9.34579	1.40964e-05	PTGER3, GRIK1, DRD2, GRIK3, TAC1, LPAR3, NPY1R, VGF, KCNIP1, KCNMB2, CALCA, GNAQ, P2RX3, GALR2, CARTPT, GNB4, CACNA1E, CHRNA6, CHRNE, MT3	154	492	12092	3.19185	0.0194587	0.00218101	0.0232115
GOTERM_BP_FAT	GO:0019725	cellular homeostasis	19	8.8785	1.64842e-05	SEPW1, PTGER3, GRIK1, DRD2, GRIK3, TAC1, LPAR3, NPY1R, KCNIP1, KCNMB2, CALCA, GNAQ, P2RX3, GALR2, CARTPT, GNB4, CHRNA6, CHRNE, MT3	154	453	12092	3.29331	0.0227172	0.00229528	0.0271428
GOTERM_BP_FAT	GO:0006873	cellular ion homeostasis	17	7.94393	1.79457e-05	PTGER3, GRIK1, DRD2, GRIK3, TAC1, LPAR3, NPY1R, KCNIP1, KCNMB2, CALCA, GNAQ, P2RX3, GALR2, GNB4, CHRNA6, CHRNE, MT3	154	370	12092	3.60765	0.0247062	0.00227165	0.029549
GOTERM_BP_FAT	GO:0015672	monovalent inorganic cation transport	15	7.00935	1.83666e-05	FXYD2, KCNC4, KCNK18, KCNA3, KCNIP2, KCNK2, KCNIP1, KCNIP4, KCNMB2, KCNJ5, KCNT1, KCNH6, SCN11A, SLC5A7, KCNE3	154	290	12092	4.06135	0.0252783	0.00213133	0.030242
GOTERM_BP_FAT	GO:0007610	behavior	18	8.41121	2.56534e-05	GRIK1, DRD2, TRPV1, ADCY5, TAC1, NPY1R, ASL, GAL, HPRT1, NPY5R, KLHL1, CALCA, GNAQ, IAPP, P2RX3, CRH, CARTPT, TCF15	154	424	12092	3.33337	0.0351294	0.00274709	0.0422377
GOTERM_CC_FAT	GO:0044459	plasma membrane part	38	17.757	2.595e-05	CLDN16, FXYD2, RAB3B, KCNC4, LZTS1, GRIK1, CADM1, DRD2, GRIK3, C6, KCNA3, SYT9, CLDN10, CD72, KCNIP2, KCNMB2, SYNPR, CHRNA6, CAMK2A, DDAH1, CACNA2D1, TRPC4, TRPC3, PTPRU, SLCO1A5, KCNK2, KCNJ5, SCGN, AMIGO2, GNAQ, KCNH6, DSP, RGS7, SCN11A, CACNA1E, GNB4, CHRNE, GFRA3	149	1358	10776	2.02374	0.00484097	0.000970073	0.0321627
GOTERM_BP_FAT	GO:0031644	regulation of neurological system process	12	5.60748	2.62569e-05	CALCA, LZTS1, NOS1, GRIK1, DRD2, GRIK3, P2RX3, TAC1, CARTPT, VGF, CAMK2A, NPY5R	154	188	12092	5.01188	0.0359408	0.00261106	0.0432312
GOTERM_MF_FAT	GO:0022843	voltage-gated cation channel activity	10	4.6729	2.77436e-05	KCNJ5, KCNC4, CACNA2D1, GRIK1, KCNH6, KCNA3, CACNA1E, SCN11A, KCNK2, KCNE3	147	129	11963	6.3086	0.00974582	0.000889933	0.0379858
GOTERM_BP_FAT	GO:0007218	neuropeptide signaling pathway	8	3.73832	3.05522e-05	CALCA, SSTR1, TAC1, CARTPT, NPY1R, PCSK1N, GAL, ADCYAP1	154	71	12092	8.84727	0.0416962	0.00283533	0.0503016
GOTERM_BP_FAT	GO:0042592	homeostatic process	24	11.215	3.12004e-05	XDH, SEPW1, PTGER3, GRIK1, DRD2, IL7, TRPV1, GRIK3, LPAR3, TAC1, NPY1R, VGF, KCNIP1, KCNMB2, CALCA, GNAQ, P2RX3, GALR2, CARTPT, GNB4, CACNA1E, CHRNA6, CHRNE, MT3	154	714	12092	2.63931	0.0425617	0.00271468	0.0513685
GOTERM_CC_FAT	GO:0043025	cell soma	14	6.54206	4.42045e-05	GRIK1, DRD2, CPNE5, GRIK3, TAC1, PDE10A, VGF, KCNIP1, KLHL1, CALCA, IAPP, P2RX3, CACNA1E, PDE9A	149	253	10776	4.00202	0.00823234	0.00137679	0.0547817
GOTERM_BP_FAT	GO:0050801	ion homeostasis	17	7.94393	4.90939e-05	PTGER3, GRIK1, DRD2, GRIK3, TAC1, LPAR3, NPY1R, KCNIP1, KCNMB2, CALCA, GNAQ, P2RX3, GALR2, GNB4, CHRNA6, CHRNE, MT3	154	402	12092	3.32048	0.0661492	0.00401771	0.0808174
GOTERM_BP_FAT	GO:0044057	regulation of system process	15	7.00935	5.24328e-05	LZTS1, NOS1, GRIK1, DRD2, GRIK3, TAC1, MSTN, NPY1R, VGF, NPY5R, CALCA, P2RX3, CRH, CARTPT, CAMK2A	154	319	12092	3.69214	0.0704858	0.0040525	0.0863116
GOTERM_BP_FAT	GO:0019932	second-messenger-mediated signaling	11	5.14019	5.60123e-05	CALCA, PTGER3, GNAQ, RXFP1, DRD2, ADCY5, GALR2, LPAR3, PDE9A, GNB4, RCAN3	154	169	12092	5.11074	0.0751126	0.00410122	0.0922014
GOTERM_BP_FAT	GO:0010959	regulation of metal ion transport	8	3.73832	9.78308e-05	CALCA, TRPC4, CACNA2D1, NOS1, GNAQ, DRD2, LPAR3, KCNE3	154	85	12092	7.39007	0.127491	0.00679594	0.160986
GOTERM_BP_FAT	GO:0046851	negative regulation of bone remodeling	4	1.86916	0.000106178	CALCA, IAPP, CARTPT, INPP5D	154	8	12092	39.2597	0.137586	0.00702378	0.174711
GOTERM_BP_FAT	GO:0045779	negative regulation of bone resorption	4	1.86916	0.000106178	CALCA, IAPP, CARTPT, INPP5D	154	8	12092	39.2597	0.137586	0.00702378	0.174711
GOTERM_BP_FAT	GO:0007200	activation of phospholipase C activity by G-protein coupled receptor protein signaling pathway coupled to IP3 second messenger	6	2.80374	0.000157642	CALCA, PTGER3, GNAQ, DRD2, LPAR3, GNB4	154	41	12092	11.4907	0.197297	0.00993985	0.25929
GOTERM_BP_FAT	GO:0007215	glutamate signaling pathway	5	2.33645	0.000180926	GRIK1, GNAQ, SSTR1, GRIK3, CAMK2A	154	23	12092	17.0695	0.222937	0.0109068	0.297534
GOTERM_BP_FAT	GO:0019935	cyclic-nucleotide-mediated signaling	8	3.73832	0.000197131	CALCA, PTGER3, GNAQ, RXFP1, DRD2, ADCY5, GALR2, PDE9A	154	95	12092	6.61217	0.240297	0.0113858	0.324142
GOTERM_BP_FAT	GO:0060341	regulation of cellular localization	13	6.07477	0.000206048	RAB3B, NOS1, CADM1, DRD2, NNAT, SYT9, NPY1R, NPY5R, CRH, CARTPT, CHRNA6, RAB27B, CAMK2A	154	277	12092	3.68503	0.249684	0.0114246	0.33878
GOTERM_CC_FAT	GO:0034702	ion channel complex	10	4.6729	0.000218535	KCNC4, CACNA2D1, KCNA3, CACNA1E, SCN11A, CHRNA6, KCNIP2, CHRNE, KCNK2, KCNMB2	149	150	10776	4.82148	0.0400466	0.00582164	0.270558
GOTERM_BP_FAT	GO:0034104	negative regulation of tissue remodeling	4	1.86916	0.000223322	CALCA, IAPP, CARTPT, INPP5D	154	10	12092	31.4078	0.267539	0.0119034	0.367133
GOTERM_BP_FAT	GO:0043269	regulation of ion transport	8	3.73832	0.000224403	CALCA, TRPC4, CACNA2D1, NOS1, GNAQ, DRD2, LPAR3, KCNE3	154	97	12092	6.47583	0.268642	0.0115202	0.368907
GOTERM_CC_FAT	GO:0044456	synapse part	13	6.07477	0.000231847	RAB3B, LZTS1, CADM1, GRIK1, DRD2, GRIK3, SYT9, NPY1R, SYNPR, CHRNA6, CAMK2A, CHRNE, MT3	149	259	10776	3.63007	0.0424338	0.0054054	0.287017
GOTERM_BP_FAT	GO:0007242	intracellular signaling cascade	26	12.1495	0.000233231	RAB3B, DRD2, ADCY5, LPAR3, FGF13, CALCA, PLCB3, GALR2, DCLK3, INPP5D, RAB27B, DDAH1, PTGER3, RXFP1, DGKI, RCAN3, DAPK1, GNAQ, RAB36, CHN1, CARTPT, RGS7, DGKZ, ROR2, PDE9A, GNB4	154	925	12092	2.20703	0.27759	0.0115458	0.383394
GOTERM_BP_FAT	GO:0048265	response to pain	5	2.33645	0.000253429	CALCA, GRIK1, TRPV1, P2RX3, TAC1	154	25	12092	15.7039	0.297651	0.0121097	0.416531
GOTERM_CC_FAT	GO:0034703	cation channel complex	8	3.73832	0.000301887	KCNC4, CACNA2D1, KCNA3, CACNA1E, SCN11A, KCNIP2, KCNK2, KCNMB2	149	94	10776	6.15508	0.054897	0.00625385	0.373574
GOTERM_BP_FAT	GO:0007202	activation of phospholipase C activity	6	2.80374	0.000335469	CALCA, PTGER3, GNAQ, DRD2, LPAR3, GNB4	154	48	12092	9.81494	0.373572	0.0154698	0.55102
GOTERM_BP_FAT	GO:0010863	positive regulation of phospholipase C activity	6	2.80374	0.000335469	CALCA, PTGER3, GNAQ, DRD2, LPAR3, GNB4	154	48	12092	9.81494	0.373572	0.0154698	0.55102
GOTERM_BP_FAT	GO:0033555	multicellular organismal response to stress	6	2.80374	0.000335469	CALCA, NOS1, GRIK1, TRPV1, P2RX3, TAC1	154	48	12092	9.81494	0.373572	0.0154698	0.55102
GOTERM_BP_FAT	GO:0007188	G-protein signaling, coupled to cAMP nucleotide second messenger	7	3.27103	0.000364948	CALCA, PTGER3, GNAQ, RXFP1, DRD2, ADCY5, GALR2	154	75	12092	7.32848	0.398802	0.0162799	0.599305
GOTERM_CC_FAT	GO:0042995	cell projection	23	10.7477	0.000367108	S100A6, LZTS1, NOS1, GRIK1, CADM1, DRD2, TRPV1, CPNE5, GRIK3, ADRBK2, TAC1, DPYSL3, NPY1R, KCNIP2, VGF, KCNIP1, SLCO1A5, KLHL1, ADCYAP1, CALCA, P2RX3, GNB4, CAMK2A	149	727	10776	2.28805	0.0663576	0.00684267	0.454114
GOTERM_CC_FAT	GO:0030425	dendrite	12	5.60748	0.000375027	LZTS1, NOS1, GRIK1, CADM1, DRD2, GRIK3, P2RX3, ADRBK2, KCNIP2, KCNIP1, CAMK2A, KLHL1	149	234	10776	3.70883	0.0677397	0.00635636	0.463888
GOTERM_BP_FAT	GO:0051969	regulation of transmission of nerve impulse	10	4.6729	0.000395969	LZTS1, GRIK1, DRD2, GRIK3, P2RX3, TAC1, CARTPT, VGF, CAMK2A, NPY5R	154	176	12092	4.46133	0.424255	0.0171048	0.650091
GOTERM_BP_FAT	GO:0040008	regulation of growth	13	6.07477	0.000401464	FXYD2, IGFBPL1, DRD2, IL7, TRPV1, MSTN, LMX1A, NPY1R, CD53, VGF, FOXS1, PCSK1N, MT3	154	298	12092	3.42535	0.42865	0.0168192	0.659084
GOTERM_BP_FAT	GO:0006525	arginine metabolic process	4	1.86916	0.000401871	NOS1, PADI3, ASL, DDAH1	154	12	12092	26.1732	0.428974	0.016345	0.65975
GOTERM_BP_FAT	GO:0007190	activation of adenylate cyclase activity	6	2.80374	0.00044642	CALCA, GNAQ, RXFP1, ADCY5, GALR2, ADCYAP1	154	51	12092	9.23759	0.463371	0.017627	0.732635
GOTERM_BP_FAT	GO:0010518	positive regulation of phospholipase activity	6	2.80374	0.00044642	CALCA, PTGER3, GNAQ, DRD2, LPAR3, GNB4	154	51	12092	9.23759	0.463371	0.017627	0.732635
GOTERM_BP_FAT	GO:0045761	regulation of adenylate cyclase activity	7	3.27103	0.00045128	CALCA, GNAQ, RXFP1, DRD2, ADCY5, GALR2, ADCYAP1	154	78	12092	7.04662	0.466996	0.0173266	0.740581
GOTERM_BP_FAT	GO:0007187	G-protein signaling, coupled to cyclic nucleotide second messenger	7	3.27103	0.000517149	CALCA, PTGER3, GNAQ, RXFP1, DRD2, ADCY5, GALR2	154	80	12092	6.87045	0.513779	0.0193003	0.848246
GOTERM_BP_FAT	GO:0045762	positive regulation of adenylate cyclase activity	6	2.80374	0.000534411	CALCA, GNAQ, RXFP1, ADCY5, GALR2, ADCYAP1	154	53	12092	8.889	0.525346	0.0194187	0.876443
GOTERM_BP_FAT	GO:0031279	regulation of cyclase activity	7	3.27103	0.00055277	CALCA, GNAQ, RXFP1, DRD2, ADCY5, GALR2, ADCYAP1	154	81	12092	6.78563	0.537345	0.0195694	0.906423
GOTERM_BP_FAT	GO:0010517	regulation of phospholipase activity	6	2.80374	0.000583003	CALCA, PTGER3, GNAQ, DRD2, LPAR3, GNB4	154	54	12092	8.72439	0.556449	0.0201185	0.955776
GOTERM_BP_FAT	GO:0051480	cytosolic calcium ion homeostasis	8	3.73832	0.0006012	CALCA, PTGER3, DRD2, GALR2, TAC1, LPAR3, GNB4, NPY1R	154	114	12092	5.51014	0.567566	0.0202393	0.98547
GOTERM_BP_FAT	GO:0051339	regulation of lyase activity	7	3.27103	0.000629716	CALCA, GNAQ, RXFP1, DRD2, ADCY5, GALR2, ADCYAP1	154	83	12092	6.62212	0.584428	0.0206901	1.03198
GOTERM_BP_FAT	GO:0031281	positive regulation of cyclase activity	6	2.80374	0.000634837	CALCA, GNAQ, RXFP1, ADCY5, GALR2, ADCYAP1	154	55	12092	8.56576	0.587387	0.0203766	1.04034
GOTERM_BP_FAT	GO:0045124	regulation of bone resorption	4	1.86916	0.000652662	CALCA, IAPP, CARTPT, INPP5D	154	14	12092	22.4341	0.597519	0.0204718	1.0694
GOTERM_BP_FAT	GO:0031645	negative regulation of neurological system process	5	2.33645	0.000672541	CALCA, GRIK1, DRD2, GRIK3, NPY5R	154	32	12092	12.2687	0.608527	0.0206252	1.1018
GOTERM_CC_FAT	GO:0045202	synapse	15	7.00935	0.000710791	RAB3B, NOS1, LZTS1, CADM1, GRIK1, DRD2, GRIK3, ADRBK2, SYT9, NPY1R, SYNPR, CHRNA6, CHRNE, CAMK2A, MT3	149	379	10776	2.86235	0.124504	0.0110193	0.877532
GOTERM_BP_FAT	GO:0042391	regulation of membrane potential	9	4.20561	0.00072007	GRIK1, GNAQ, GRIK3, P2RX3, TAC1, CHRNA6, CHRNE, KCNIP1, KCNMB2	154	153	12092	4.61879	0.63364	0.0215926	1.17923
GOTERM_BP_FAT	GO:0006816	calcium ion transport	8	3.73832	0.000738673	CLDN16, TRPC4, CACNA2D1, TRPC3, TRPV1, DRD2, CACNA1E, CAMK2A	154	118	12092	5.32335	0.643025	0.0216784	1.20953
GOTERM_CC_FAT	GO:0008021	synaptic vesicle	7	3.27103	0.000739189	RAB3B, SYNPR, CADM1, DRD2, SYT9, NPY1R, MT3	149	79	10776	6.40829	0.129145	0.0105805	0.912444
GOTERM_BP_FAT	GO:0051349	positive regulation of lyase activity	6	2.80374	0.000748777	CALCA, GNAQ, RXFP1, ADCY5, GALR2, ADCYAP1	154	57	12092	8.26521	0.648022	0.021519	1.22598
GOTERM_BP_FAT	GO:0060193	positive regulation of lipase activity	6	2.80374	0.000748777	CALCA, PTGER3, GNAQ, DRD2, LPAR3, GNB4	154	57	12092	8.26521	0.648022	0.021519	1.22598
GOTERM_BP_FAT	GO:0046850	regulation of bone remodeling	4	1.86916	0.000808283	CALCA, IAPP, CARTPT, INPP5D	154	15	12092	20.9385	0.676062	0.0227415	1.3228
GOTERM_BP_FAT	GO:0030817	regulation of cAMP biosynthetic process	7	3.27103	0.000808349	CALCA, GNAQ, RXFP1, DRD2, ADCY5, GALR2, ADCYAP1	154	87	12092	6.31766	0.676092	0.0222936	1.3229
GOTERM_BP_FAT	GO:0019933	cAMP-mediated signaling	7	3.27103	0.000808349	CALCA, PTGER3, GNAQ, RXFP1, DRD2, ADCY5, GALR2	154	87	12092	6.31766	0.676092	0.0222936	1.3229
GOTERM_BP_FAT	GO:0030814	regulation of cAMP metabolic process	7	3.27103	0.000858576	CALCA, GNAQ, RXFP1, DRD2, ADCY5, GALR2, ADCYAP1	154	88	12092	6.24587	0.698012	0.0232044	1.40456
GOTERM_BP_FAT	GO:0048015	phosphoinositide-mediated signaling	6	2.80374	0.00102167	CALCA, PTGER3, GNAQ, DRD2, LPAR3, GNB4	154	61	12092	7.72323	0.759475	0.0270305	1.66926
GOTERM_CC_FAT	GO:0043679	nerve terminal	6	2.80374	0.00116539	CALCA, GRIK1, DRD2, GRIK3, P2RX3, ADCYAP1	149	58	10776	7.4816	0.195919	0.0154547	1.43506
GOTERM_BP_FAT	GO:0050804	regulation of synaptic transmission	9	4.20561	0.00117605	LZTS1, GRIK1, DRD2, GRIK3, P2RX3, TAC1, VGF, CAMK2A, NPY5R	154	165	12092	4.28288	0.806094	0.0304765	1.91921
GOTERM_BP_FAT	GO:0043266	regulation of potassium ion transport	4	1.86916	0.00118576	NOS1, GNAQ, DRD2, KCNE3	154	17	12092	18.4752	0.808704	0.0301641	1.93492
GOTERM_MF_FAT	GO:0005227	calcium activated cation channel activity	4	1.86916	0.0012703	KCNT1, TRPC3, KCNK18, KCNMB2	147	18	11963	18.0847	0.361542	0.0367012	1.72561
GOTERM_BP_FAT	GO:0030802	regulation of cyclic nucleotide biosynthetic process	7	3.27103	0.00142661	CALCA, GNAQ, RXFP1, DRD2, ADCY5, GALR2, ADCYAP1	154	97	12092	5.66635	0.863321	0.0355372	2.32361
GOTERM_BP_FAT	GO:0003012	muscle system process	7	3.27103	0.00142661	NOS1, TRPV1, DRD2, P2RX3, MSTN, NPY1R, MYL6L	154	97	12092	5.66635	0.863321	0.0355372	2.32361
GOTERM_BP_FAT	GO:0030808	regulation of nucleotide biosynthetic process	7	3.27103	0.00142661	CALCA, GNAQ, RXFP1, DRD2, ADCY5, GALR2, ADCYAP1	154	97	12092	5.66635	0.863321	0.0355372	2.32361
GOTERM_BP_FAT	GO:0051924	regulation of calcium ion transport	6	2.80374	0.00145911	CALCA, TRPC4, CACNA2D1, NOS1, DRD2, LPAR3	154	66	12092	7.13813	0.869384	0.0356954	2.37595
GOTERM_CC_FAT	GO:0030424	axon	10	4.6729	0.00156425	CALCA, GRIK1, CADM1, DRD2, GRIK3, P2RX3, TAC1, ADRBK2, NPY1R, ADCYAP1	149	197	10776	3.67118	0.253787	0.0193271	1.92185
GOTERM_BP_FAT	GO:0030799	regulation of cyclic nucleotide metabolic process	7	3.27103	0.00158467	CALCA, GNAQ, RXFP1, DRD2, ADCY5, GALR2, ADCYAP1	154	99	12092	5.55188	0.890385	0.038043	2.5779
GOTERM_CC_FAT	GO:0043195	terminal button	5	2.33645	0.0015864	CALCA, GRIK1, GRIK3, P2RX3, ADCYAP1	149	37	10776	9.77326	0.256876	0.0183847	1.94882
GOTERM_BP_FAT	GO:0007212	dopamine receptor signaling pathway	4	1.86916	0.00165867	GNAQ, DRD2, ADCY5, NSG1	154	19	12092	16.5304	0.901145	0.0391129	2.69674
GOTERM_BP_FAT	GO:0032228	regulation of synaptic transmission, GABAergic	4	1.86916	0.00165867	GRIK1, DRD2, TAC1, NPY5R	154	19	12092	16.5304	0.901145	0.0391129	2.69674
GOTERM_BP_FAT	GO:0040014	regulation of multicellular organism growth	6	2.80374	0.00178013	TRPV1, DRD2, NPY1R, PCSK1N, VGF, FOXS1	154	69	12092	6.82778	0.916567	0.0412231	2.89152
GOTERM_BP_FAT	GO:0007204	elevation of cytosolic calcium ion concentration	7	3.27103	0.00184631	CALCA, PTGER3, DRD2, GALR2, TAC1, LPAR3, GNB4	154	102	12092	5.38859	0.923933	0.0420269	2.99748
GOTERM_BP_FAT	GO:0006875	cellular metal ion homeostasis	9	4.20561	0.00189671	CALCA, PTGER3, DRD2, GALR2, TAC1, LPAR3, GNB4, NPY1R, MT3	154	178	12092	3.97009	0.929103	0.0424579	3.07811
GOTERM_BP_FAT	GO:0044093	positive regulation of molecular function	16	7.47664	0.00191324	PTGER3, RXFP1, DRD2, ADCY5, C6, LPAR3, DGKI, ADCYAP1, CALCA, GNAQ, GALR2, DGKZ, CARTPT, GNB4, DDAH1, CAMK2A	154	507	12092	2.47793	0.930721	0.0421444	3.10454
GOTERM_BP_FAT	GO:0034103	regulation of tissue remodeling	4	1.86916	0.00193338	CALCA, IAPP, CARTPT, INPP5D	154	20	12092	15.7039	0.932643	0.0419174	3.13673
GOTERM_BP_FAT	GO:0032845	negative regulation of homeostatic process	4	1.86916	0.00193338	CALCA, IAPP, CARTPT, INPP5D	154	20	12092	15.7039	0.932643	0.0419174	3.13673
GOTERM_BP_FAT	GO:0009266	response to temperature stimulus	7	3.27103	0.00194041	CALCA, NOS1, TRPV1, P2RX3, MSTN, PCSK1N, VGF	154	103	12092	5.33628	0.933301	0.0414233	3.14798
GOTERM_BP_FAT	GO:0006140	regulation of nucleotide metabolic process	7	3.27103	0.00194041	CALCA, GNAQ, RXFP1, DRD2, ADCY5, GALR2, ADCYAP1	154	103	12092	5.33628	0.933301	0.0414233	3.14798
GOTERM_BP_FAT	GO:0060191	regulation of lipase activity	6	2.80374	0.00202109	CALCA, PTGER3, GNAQ, DRD2, LPAR3, GNB4	154	71	12092	6.63545	0.940409	0.0424607	3.27682
GOTERM_CC_FAT	GO:0030141	secretory granule	10	4.6729	0.00212497	RAB3B, NOS1, IAPP, DRD2, SYT9, PCSK1N, VGF, RAB27B, GAL, ACPP	149	206	10776	3.51078	0.328199	0.0231279	2.60244
GOTERM_MF_FAT	GO:0015276	ligand-gated ion channel activity	7	3.27103	0.00215397	KCNJ5, GRIK1, GRIK3, P2RX3, KCNH6, CHRNA6, CHRNE	147	109	11963	5.2263	0.532882	0.0568706	2.90969
GOTERM_MF_FAT	GO:0022834	ligand-gated channel activity	7	3.27103	0.00215397	KCNJ5, GRIK1, GRIK3, P2RX3, KCNH6, CHRNA6, CHRNE	147	109	11963	5.2263	0.532882	0.0568706	2.90969
GOTERM_BP_FAT	GO:0010579	positive regulation of adenylate cyclase activity by G-protein signaling pathway	5	2.33645	0.0022575	CALCA, GNAQ, RXFP1, ADCY5, GALR2	154	44	12092	8.92267	0.95717	0.0466136	3.65346
GOTERM_BP_FAT	GO:0010578	regulation of adenylate cyclase activity involved in G-protein signaling	5	2.33645	0.0022575	CALCA, GNAQ, RXFP1, ADCY5, GALR2	154	44	12092	8.92267	0.95717	0.0466136	3.65346
GOTERM_BP_FAT	GO:0007189	activation of adenylate cyclase activity by G-protein signaling pathway	5	2.33645	0.0022575	CALCA, GNAQ, RXFP1, ADCY5, GALR2	154	44	12092	8.92267	0.95717	0.0466136	3.65346
GOTERM_BP_FAT	GO:0055065	metal ion homeostasis	9	4.20561	0.00242298	CALCA, PTGER3, DRD2, GALR2, TAC1, LPAR3, GNB4, NPY1R, MT3	154	185	12092	3.81987	0.966012	0.049221	3.91627
GOTERM_BP_FAT	GO:0009064	glutamine family amino acid metabolic process	5	2.33645	0.00245367	AMDHD1, NOS1, PADI3, ASL, DDAH1	154	45	12092	8.72439	0.967438	0.0491149	3.96493
GOTERM_BP_FAT	GO:0008277	regulation of G-protein coupled receptor protein signaling pathway	5	2.33645	0.00245367	RAMP3, DRD2, RGS7, ADRBK2, RGS14	154	45	12092	8.72439	0.967438	0.0491149	3.96493
GOTERM_BP_FAT	GO:0010648	negative regulation of cell communication	10	4.6729	0.00259878	GRIK1, DRD2, GRIK3, RGS4, RGS7, DGKZ, ADRBK2, INPP5D, RGS14, NPY5R	154	230	12092	3.41389	0.973415	0.0512132	4.19473
GOTERM_BP_FAT	GO:0015674	di-, tri-valent inorganic cation transport	8	3.73832	0.00263351	CLDN16, TRPC4, CACNA2D1, TRPC3, TRPV1, DRD2, CACNA1E, CAMK2A	154	147	12092	4.27317	0.974675	0.0511587	4.24966
GOTERM_BP_FAT	GO:0019233	sensory perception of pain	5	2.33645	0.00266125	CALCA, IAPP, TRPV1, TAC1, NPY1R	154	46	12092	8.53473	0.975638	0.050975	4.29351
GOTERM_BP_FAT	GO:0043271	negative regulation of ion transport	4	1.86916	0.0029213	CALCA, NOS1, GNAQ, DRD2	154	23	12092	13.6556	0.983063	0.055068	4.70363
GOTERM_BP_FAT	GO:0032844	regulation of homeostatic process	7	3.27103	0.00309337	CALCA, IAPP, DRD2, TAC1, CARTPT, INPP5D, DDAH1	154	113	12092	4.86404	0.986685	0.0574462	4.97411
GOTERM_BP_FAT	GO:0050805	negative regulation of synaptic transmission	4	1.86916	0.00330791	GRIK1, DRD2, GRIK3, NPY5R	154	24	12092	13.0866	0.990136	0.0605092	5.31032
GOTERM_MF_FAT	GO:0005509	calcium ion binding	18	8.41121	0.00338128	BGLAP, S100A6, CACNA2D1, TRPC3, RXFP1, TRPV1, PADI3, SYT9, KCNIP2, KCNIP1, MYL6L, KCNIP4, SCGN, PLCB3, CAMK4, NPTX2, CACNA1E, CDH11	147	672	11963	2.17985	0.697482	0.0818561	4.5323
GOTERM_BP_FAT	GO:0048167	regulation of synaptic plasticity	6	2.80374	0.00359608	LZTS1, GRIK1, DRD2, P2RX3, VGF, CAMK2A	154	81	12092	5.81626	0.993408	0.064767	5.76016
GOTERM_MF_FAT	GO:0043169	cation binding	51	23.8318	0.00377418	S100A6, KCNC4, TRPV1, ADCY5, KCNK18, SYT9, KCNIP2, KCNIP1, KCNIP4, PLCB3, B3GALNT1, DDAH1, NT5E, MT3, RXFP1, PADI3, PDXP, PDE10A, KCNT1, CAMK4, KCNH6, TNNI3K, SCN11A, NGB, ADAM19, TPH2, CLDN16, XDH, FXYD2, KCNA3, MYT1, HPRT1, MYL6L, NPTX2, SLC39A3, KCNE3, EWSR1, CACNA2D1, BGLAP, NOS1, TRPC3, LMX1A, ACPP, KCNJ5, SCGN, CHN1, DGKZ, CACNA1E, SLC5A7, SLC14A1, CDH11	147	2893	11963	1.43465	0.736791	0.0851426	5.04641
GOTERM_MF_FAT	GO:0005249	voltage-gated potassium channel activity	6	2.80374	0.00398676	KCNJ5, KCNC4, KCNH6, KCNA3, KCNK2, KCNE3	147	86	11963	5.67774	0.755891	0.0843615	5.3235
GOTERM_BP_FAT	GO:0051047	positive regulation of secretion	7	3.27103	0.00399455	GRIK1, CADM1, DRD2, NNAT, CRH, TAC1, CARTPT	154	119	12092	4.61879	0.996226	0.0707851	6.37889
GOTERM_BP_FAT	GO:0043085	positive regulation of catalytic activity	14	6.54206	0.00416933	PTGER3, RXFP1, DRD2, ADCY5, C6, LPAR3, DGKI, ADCYAP1, CALCA, GNAQ, GALR2, DGKZ, CARTPT, GNB4	154	444	12092	2.47584	0.997045	0.0728491	6.64907
GOTERM_MF_FAT	GO:0030594	neurotransmitter receptor activity	6	2.80374	0.0041891	SSTR1, GALR2, CHRNA6, NPY1R, CHRNE, NPY5R	147	87	11963	5.61248	0.772785	0.083477	5.58655
GOTERM_BP_FAT	GO:0051967	negative regulation of synaptic transmission, glutamatergic	3	1.40187	0.00423642	GRIK1, DRD2, GRIK3	154	8	12092	29.4448	0.99731	0.0730664	6.75258
GOTERM_BP_FAT	GO:0046883	regulation of hormone secretion	6	2.80374	0.00442232	NOS1, DRD2, NNAT, CRH, SYT9, NPY1R	154	85	12092	5.54255	0.997926	0.0752274	7.03885
GOTERM_CC_FAT	GO:0043204	perikaryon	5	2.33645	0.00448209	DRD2, GRIK3, PDE9A, CACNA1E, PDE10A	149	49	10776	7.37981	0.568305	0.0455964	5.41626
GOTERM_CC_FAT	GO:0033267	axon part	6	2.80374	0.00455582	CALCA, GRIK1, DRD2, GRIK3, P2RX3, ADCYAP1	149	79	10776	5.49282	0.574242	0.0439464	5.50305
GOTERM_BP_FAT	GO:0006936	muscle contraction	6	2.80374	0.00464836	NOS1, TRPV1, DRD2, P2RX3, NPY1R, MYL6L	154	86	12092	5.4781	0.998489	0.0779783	7.38582
GOTERM_BP_FAT	GO:0006939	smooth muscle contraction	4	1.86916	0.0046499	TRPV1, DRD2, P2RX3, NPY1R	154	27	12092	11.6325	0.998492	0.0770782	7.38817
GOTERM_BP_FAT	GO:0006874	cellular calcium ion homeostasis	8	3.73832	0.00481639	CALCA, PTGER3, DRD2, GALR2, TAC1, LPAR3, GNB4, NPY1R	154	164	12092	3.83022	0.998806	0.0787985	7.64296
GOTERM_MF_FAT	GO:0046872	metal ion binding	50	23.3645	0.00484446	S100A6, KCNC4, TRPV1, ADCY5, KCNK18, SYT9, KCNIP2, KCNIP1, KCNIP4, PLCB3, B3GALNT1, DDAH1, NT5E, MT3, RXFP1, PADI3, PDXP, PDE10A, KCNT1, CAMK4, KCNH6, TNNI3K, SCN11A, NGB, ADAM19, TPH2, CLDN16, XDH, FXYD2, KCNA3, MYT1, HPRT1, MYL6L, NPTX2, SLC39A3, EWSR1, KCNE3, CACNA2D1, BGLAP, NOS1, TRPC3, LMX1A, KCNJ5, SCGN, CHN1, DGKZ, CACNA1E, SLC5A7, SLC14A1, CDH11	147	2854	11963	1.42573	0.819901	0.0908417	6.43389
GOTERM_BP_FAT	GO:0051970	negative regulation of transmission of nerve impulse	4	1.86916	0.00516009	GRIK1, DRD2, GRIK3, NPY5R	154	28	12092	11.2171	0.999262	0.0832212	8.16683
GOTERM_BP_FAT	GO:0030182	neuron differentiation	14	6.54206	0.00529927	DRD2, NNAT, DPYSL4, DPYSL3, LMX1A, PTPRU, KCNIP2, VGF, HPRT1, KLHL1, GNAQ, GALR2, EFNA5, GFRA3	154	457	12092	2.40541	0.999393	0.0844008	8.37818
GOTERM_BP_FAT	GO:0030432	peristalsis	3	1.40187	0.00540175	DRD2, P2RX3, NPY1R	154	9	12092	26.1732	0.999474	0.0849978	8.5335
GOTERM_MF_FAT	GO:0043167	ion binding	51	23.8318	0.00541042	S100A6, KCNC4, TRPV1, ADCY5, KCNK18, SYT9, KCNIP2, KCNIP1, KCNIP4, PLCB3, B3GALNT1, DDAH1, NT5E, MT3, RXFP1, PADI3, PDXP, PDE10A, KCNT1, CAMK4, KCNH6, TNNI3K, SCN11A, NGB, ADAM19, TPH2, CLDN16, XDH, FXYD2, KCNA3, MYT1, HPRT1, MYL6L, NPTX2, SLC39A3, KCNE3, EWSR1, CACNA2D1, BGLAP, NOS1, TRPC3, LMX1A, ACPP, KCNJ5, SCGN, CHN1, DGKZ, CACNA1E, SLC5A7, SLC14A1, CDH11	147	2943	11963	1.41027	0.852667	0.0958796	7.15996
GOTERM_BP_FAT	GO:0055074	calcium ion homeostasis	8	3.73832	0.00548701	CALCA, PTGER3, DRD2, GALR2, TAC1, LPAR3, GNB4, NPY1R	154	168	12092	3.73902	0.999533	0.0853241	8.66254
GOTERM_CC_FAT	GO:0031224	intrinsic to membrane	78	36.4486	0.00573992	KCNC4, CADM1, GRIK1, TUSC5, TRPV1, GRIK3, ADCY5, KCNK18, SYT9, LPAR3, TSPAN8, CD53, SLC7A4, KCNIP2, CDS2, PTGIR, B3GALNT1, GALR2, NSG1, CHRNA6, LRRC55, RAB27B, NT5E, DDAH1, HIGD1A, RAMP3, LRRC3, TMEFF1, PTGER3, RXFP1, MRGPRD, ALK, AMIGO2, KCNT1, SSTR1, PTGDR, KCNH6, SCN11A, EFNA5, CLDN16, FXYD2, MAL2, DRD2, C6, OPRK1, MMD, CTXN3, KCNA3, CLDN10, GPR68, CD72, PAQR5, KCNMB2, SYNPR, GPR27, HS6ST2, AR…	149	4467	10776	1.26284	0.659199	0.0524001	6.88702
GOTERM_CC_FAT	GO:0031982	vesicle	18	8.41121	0.00584642	BGLAP, RAB3B, NOS1, CADM1, DRD2, SYT9, DPYSL3, NPY1R, GAL, VGF, ACPP, SCGN, SYNPR, IAPP, PCSK1N, RAB27B, CAMK2A, MT3	149	631	10776	2.06307	0.665958	0.0508741	7.01059
GOTERM_BP_FAT	GO:0051336	regulation of hydrolase activity	10	4.6729	0.0062426	CALCA, NOS1, PTGER3, GNAQ, DRD2, C6, LPAR3, GNB4, DGKI, RGD1560723	154	263	12092	2.98553	0.999838	0.095469	9.79864
GOTERM_MF_FAT	GO:0042165	neurotransmitter binding	6	2.80374	0.00635227	SSTR1, GALR2, CHRNA6, NPY1R, CHRNE, NPY5R	147	96	11963	5.08631	0.894549	0.106381	8.35671
GOTERM_BP_FAT	GO:0007268	synaptic transmission	9	4.20561	0.00669054	GRIK1, CAMK4, DRD2, GRIK3, P2RX3, TAC1, CARTPT, SLC5A7, NPY5R	154	219	12092	3.22683	0.999914	0.100881	10.4659
GOTERM_CC_FAT	GO:0030136	clathrin-coated vesicle	7	3.27103	0.00718622	RAB3B, SYNPR, CADM1, DRD2, SYT9, NPY1R, MT3	149	124	10776	4.0827	0.740416	0.0594622	8.55216
GOTERM_CC_FAT	GO:0031988	membrane-bounded vesicle	16	7.47664	0.00762988	BGLAP, RAB3B, NOS1, CADM1, DRD2, SYT9, NPY1R, GAL, VGF, ACPP, SYNPR, IAPP, RAB27B, PCSK1N, CAMK2A, MT3	149	543	10776	2.13104	0.761231	0.0603728	9.05744
GOTERM_CC_FAT	GO:0034705	potassium channel complex	5	2.33645	0.00768041	KCNC4, KCNA3, KCNIP2, KCNK2, KCNMB2	149	57	10776	6.34405	0.763494	0.0583054	9.11483
GOTERM_CC_FAT	GO:0008076	voltage-gated potassium channel complex	5	2.33645	0.00768041	KCNC4, KCNA3, KCNIP2, KCNK2, KCNMB2	149	57	10776	6.34405	0.763494	0.0583054	9.11483
GOTERM_BP_FAT	GO:0051345	positive regulation of hydrolase activity	7	3.27103	0.00814064	CALCA, PTGER3, GNAQ, DRD2, C6, LPAR3, GNB4	154	138	12092	3.98287	0.999989	0.120171	12.5943
GOTERM_CC_FAT	GO:0044463	cell projection part	10	4.6729	0.0083325	CALCA, LZTS1, NOS1, GRIK1, DRD2, GRIK3, P2RX3, ADRBK2, SLCO1A5, ADCYAP1	149	254	10776	2.84733	0.79085	0.0606698	9.8524
GOTERM_BP_FAT	GO:0032147	activation of protein kinase activity	6	2.80374	0.00837974	CALCA, DRD2, ADCY5, CARTPT, DGKZ, DGKI	154	99	12092	4.75876	0.999992	0.122203	12.9406
GOTERM_MF_FAT	GO:0005230	extracellular ligand-gated ion channel activity	5	2.33645	0.00854669	GRIK1, GRIK3, P2RX3, CHRNA6, CHRNE	147	66	11963	6.16522	0.951682	0.134357	11.0897
GOTERM_MF_FAT	GO:0005262	calcium channel activity	5	2.33645	0.00947891	TRPC4, CACNA2D1, TRPC3, TRPV1, CACNA1E	147	68	11963	5.98389	0.965335	0.141715	12.2277
GOTERM_BP_FAT	GO:0030003	cellular cation homeostasis	9	4.20561	0.0095572	CALCA, PTGER3, DRD2, GALR2, TAC1, LPAR3, GNB4, NPY1R, MT3	154	233	12092	3.03294	0.999998	0.136799	14.6274
GOTERM_BP_FAT	GO:0048266	behavioral response to pain	3	1.40187	0.00965982	GRIK1, TRPV1, P2RX3	154	12	12092	19.6299	0.999999	0.136774	14.773
GOTERM_BP_FAT	GO:0051952	regulation of amine transport	4	1.86916	0.00966639	GRIK1, DRD2, CARTPT, CHRNA6	154	35	12092	8.97365	0.999999	0.135494	14.7823
GOTERM_CC_FAT	GO:0016021	integral to membrane	75	35.0467	0.00973632	KCNC4, CADM1, GRIK1, TUSC5, TRPV1, GRIK3, ADCY5, KCNK18, SYT9, LPAR3, TSPAN8, CD53, SLC7A4, KCNIP2, CDS2, PTGIR, B3GALNT1, GALR2, NSG1, LRRC55, CHRNA6, NT5E, DDAH1, HIGD1A, RAMP3, LRRC3, TMEFF1, PTGER3, RXFP1, MRGPRD, ALK, AMIGO2, KCNT1, SSTR1, PTGDR, KCNH6, SCN11A, CLDN16, FXYD2, MAL2, DRD2, C6, OPRK1, MMD, KCNA3, CLDN10, GPR68, CD72, PAQR5, KCNMB2, SYNPR, GPR27, HS6ST2, ARMCX1, SLC39A3, KCNE3, …	149	4336	10776	1.25096	0.839524	0.0679509	11.4216
GOTERM_BP_FAT	GO:0019226	transmission of nerve impulse	10	4.6729	0.00986638	GRIK1, CAMK4, DRD2, GRIK3, P2RX3, TAC1, CARTPT, SLC5A7, NPY5R, KCNMB2	154	283	12092	2.77454	0.999999	0.136743	15.0653
GOTERM_MF_FAT	GO:0008188	neuropeptide receptor activity	4	1.86916	0.0102164	SSTR1, GALR2, NPY1R, NPY5R	147	37	11963	8.79794	0.973349	0.145814	13.1185
GOTERM_MF_FAT	GO:0042923	neuropeptide binding	4	1.86916	0.0109945	SSTR1, GALR2, NPY1R, NPY5R	147	38	11963	8.56642	0.97981	0.150075	14.0492
GOTERM_BP_FAT	GO:0008217	regulation of blood pressure	6	2.80374	0.0110708	CALCA, NOS1, DRD2, TAC1, CARTPT, NPY1R	154	106	12092	4.4445	1	0.150711	16.7508
GOTERM_BP_FAT	GO:0009408	response to heat	5	2.33645	0.011276	CALCA, NOS1, TRPV1, P2RX3, MSTN	154	69	12092	5.68982	1	0.151824	17.0347
GOTERM_BP_FAT	GO:0014821	phasic smooth muscle contraction	3	1.40187	0.011322	DRD2, P2RX3, NPY1R	154	13	12092	18.1199	1	0.150951	17.0984
GOTERM_BP_FAT	GO:0051926	negative regulation of calcium ion transport	3	1.40187	0.011322	CALCA, NOS1, DRD2	154	13	12092	18.1199	1	0.150951	17.0984
GOTERM_CC_FAT	GO:0043197	dendritic spine	5	2.33645	0.0121032	LZTS1, NOS1, DRD2, P2RX3, ADRBK2	149	65	10776	5.56324	0.897419	0.0808788	14.0106
GOTERM_CC_FAT	GO:0016023	cytoplasmic membrane-bounded vesicle	15	7.00935	0.0121582	RAB3B, NOS1, CADM1, DRD2, SYT9, NPY1R, GAL, VGF, ACPP, SYNPR, IAPP, RAB27B, PCSK1N, CAMK2A, MT3	149	520	10776	2.08622	0.898481	0.0784487	14.0698
GOTERM_MF_FAT	GO:0015269	calcium-activated potassium channel activity	3	1.40187	0.0122276	KCNT1, KCNK18, KCNMB2	147	14	11963	17.4388	0.987002	0.159467	15.5051
GOTERM_BP_FAT	GO:0048666	neuron development	11	5.14019	0.0127751	GNAQ, DRD2, GALR2, DPYSL4, DPYSL3, EFNA5, LMX1A, KCNIP2, HPRT1, KLHL1, GFRA3	154	347	12092	2.48909	1	0.16714	19.0822
GOTERM_BP_FAT	GO:0019835	cytolysis	3	1.40187	0.0131003	C6, MMD, HPRT1	154	14	12092	16.8256	1	0.169462	19.52
GOTERM_BP_FAT	GO:0002021	response to dietary excess	3	1.40187	0.0131003	TRPV1, PCSK1N, VGF	154	14	12092	16.8256	1	0.169462	19.52
GOTERM_BP_FAT	GO:0051240	positive regulation of multicellular organismal process	9	4.20561	0.0138581	CALCA, NOS1, GRIK1, TRPV1, DRD2, TAC1, CARTPT, NPY1R, FOXS1	154	249	12092	2.83805	1	0.176781	20.5317
GOTERM_BP_FAT	GO:0021953	central nervous system neuron differentiation	4	1.86916	0.0139385	GNAQ, DRD2, LMX1A, HPRT1	154	40	12092	7.85195	1	0.176121	20.6383
GOTERM_MF_FAT	GO:0022839	ion gated channel activity	3	1.40187	0.0139969	KCNT1, KCNK18, KCNMB2	147	15	11963	16.2762	0.993097	0.174179	17.5542
GOTERM_CC_FAT	GO:0030135	coated vesicle	7	3.27103	0.014369	RAB3B, SYNPR, CADM1, DRD2, SYT9, NPY1R, MT3	149	144	10776	3.51566	0.933229	0.0891046	16.4236
GOTERM_BP_FAT	GO:0051954	positive regulation of amine transport	3	1.40187	0.0149913	GRIK1, DRD2, CARTPT	154	15	12092	15.7039	1	0.186519	22.0223
GOTERM_BP_FAT	GO:0030005	cellular di-, tri-valent inorganic cation homeostasis	8	3.73832	0.0161727	CALCA, PTGER3, DRD2, GALR2, TAC1, LPAR3, GNB4, NPY1R	154	207	12092	3.03457	1	0.198019	23.5483
GOTERM_BP_FAT	GO:0032101	regulation of response to external stimulus	7	3.27103	0.0164918	CALCA, DRD2, TAC1, CARTPT, TSPAN8, NT5E, NPY5R	154	161	12092	3.41389	1	0.199803	23.9556
GOTERM_CC_FAT	GO:0031410	cytoplasmic vesicle	16	7.47664	0.0166185	RAB3B, NOS1, CADM1, DRD2, SYT9, NPY1R, GAL, VGF, ACPP, SCGN, SYNPR, IAPP, PCSK1N, RAB27B, CAMK2A, MT3	149	595	10776	1.9448	0.956447	0.0991883	18.7576
GOTERM_MF_FAT	GO:0016791	phosphatase activity	8	3.73832	0.0166778	IMPAD1, DUSP26, PDXP, PTPRT, PTPRU, INPP5D, NT5E, ACPP	147	216	11963	3.01411	0.99736	0.197389	20.5716
GOTERM_CC_FAT	GO:0030054	cell junction	13	6.07477	0.0174295	CLDN16, LZTS1, CADM1, GRIK1, GRIK3, SYT9, CLDN10, PTPRU, SYNPR, DSP, CHRNA6, CAMK2A, CHRNE	149	438	10776	2.14655	0.962674	0.100635	19.5842
GOTERM_BP_FAT	GO:0055080	cation homeostasis	9	4.20561	0.0182798	CALCA, PTGER3, DRD2, GALR2, TAC1, LPAR3, GNB4, NPY1R, MT3	154	262	12092	2.69723	1	0.217242	26.2005
GOTERM_MF_FAT	GO:0005179	hormone activity	6	2.80374	0.0190215	CALCA, IAPP, CRH, VGF, GAL, ADCYAP1	147	126	11963	3.87528	0.998863	0.215035	23.1252
GOTERM_MF_FAT	GO:0043176	amine binding	6	2.80374	0.0190215	NOS1, GRIK1, DRD2, DDAH1, ACPP, TPH2	147	126	11963	3.87528	0.998863	0.215035	23.1252
GOTERM_BP_FAT	GO:0007166	cell surface receptor linked signal transduction	45	21.028	0.0192282	GNA14, GRIK1, DRD2, GRIK3, ADCY5, OPRK1, BEX1, LPAR3, TAC1, GPR68, ADCYAP1, CALCA, PTGIR, GPR27, IAPP, GALR2, NSG1, CAMK2A, DDAH1, RAMP3, PTGER3, RXFP1, MRGPRD, MSTN, PTPRT, NPY1R, PTPRU, DGKI, GAL, ALK, KCNK2, NPY5R, EPHA5, GPR35, GNAQ, SSTR1, PTGDR, CRH, ROR2, RGS7, CARTPT, DGKZ, GNB4, PCSK1N, GFRA2	154	2591	12092	1.36371	1	0.225341	27.3659
GOTERM_BP_FAT	GO:0001508	regulation of action potential	5	2.33645	0.0201267	GNAQ, P2RX3, TAC1, KCNIP1, KCNMB2	154	82	12092	4.78777	1	0.232707	28.454
GOTERM_BP_FAT	GO:0055066	di-, tri-valent inorganic cation homeostasis	8	3.73832	0.0208521	CALCA, PTGER3, DRD2, GALR2, TAC1, LPAR3, GNB4, NPY1R	154	218	12092	2.88145	1	0.23814	29.3212
GOTERM_BP_FAT	GO:0007616	long-term memory	3	1.40187	0.0213109	DRD2, CRH, TAC1	154	18	12092	13.0866	1	0.240801	29.8646
GOTERM_BP_FAT	GO:0016337	cell-cell adhesion	8	3.73832	0.0213197	CALCA, CLDN16, AMIGO2, CADM1, ROR2, PTPRT, PTPRU, CDH11	154	219	12092	2.86829	1	0.238984	29.875
GOTERM_BP_FAT	GO:0048871	multicellular organismal homeostasis	5	2.33645	0.0217806	XDH, PTGER3, IL7, TRPV1, DRD2	154	84	12092	4.67378	1	0.241608	30.4168
GOTERM_BP_FAT	GO:0048168	regulation of neuronal synaptic plasticity	4	1.86916	0.0239435	GRIK1, DRD2, VGF, CAMK2A	154	49	12092	6.40975	1	0.260393	32.9076
GOTERM_BP_FAT	GO:0007267	cell-cell signaling	10	4.6729	0.0244032	GRIK1, CAMK4, DRD2, GRIK3, P2RX3, TAC1, CARTPT, SLC5A7, VGF, NPY5R	154	330	12092	2.37938	1	0.262713	33.4261
GOTERM_CC_FAT	GO:0030659	cytoplasmic vesicle membrane	6	2.80374	0.0271299	SYNPR, DRD2, SYT9, VGF, RAB27B, CAMK2A	149	123	10776	3.52791	0.994162	0.148478	28.8903
GOTERM_BP_FAT	GO:0051050	positive regulation of transport	8	3.73832	0.028077	GRIK1, CADM1, DRD2, NNAT, CRH, TAC1, CARTPT, LPAR3	154	232	12092	2.70757	1	0.29407	37.4365
GOTERM_BP_FAT	GO:0050796	regulation of insulin secretion	4	1.86916	0.0322871	NOS1, DRD2, NNAT, SYT9	154	55	12092	5.71051	1	0.328226	41.753
GOTERM_BP_FAT	GO:0051051	negative regulation of transport	6	2.80374	0.0324977	CALCA, NOS1, GNAQ, DRD2, NPY1R, NPY5R	154	140	12092	3.36512	1	0.327679	41.9615
GOTERM_BP_FAT	GO:0051966	regulation of synaptic transmission, glutamatergic	3	1.40187	0.0338224	GRIK1, DRD2, GRIK3	154	23	12092	10.2417	1	0.336317	43.2564
GOTERM_BP_FAT	GO:0001659	temperature homeostasis	3	1.40187	0.0338224	PTGER3, TRPV1, DRD2	154	23	12092	10.2417	1	0.336317	43.2564
GOTERM_BP_FAT	GO:0045860	positive regulation of protein kinase activity	7	3.27103	0.0344443	CALCA, DRD2, ADCY5, CARTPT, LPAR3, DGKZ, DGKI	154	191	12092	2.87768	1	0.339054	43.8548
GOTERM_MF_FAT	GO:0001602	pancreatic polypeptide receptor activity	2	0.934579	0.0361709	NPY1R, NPY5R	147	3	11963	54.254	0.999998	0.361381	39.6198
GOTERM_BP_FAT	GO:0007169	transmembrane receptor protein tyrosine kinase signaling pathway	7	3.27103	0.0367386	EPHA5, BEX1, ROR2, PTPRT, ALK, GFRA2, ADCYAP1	154	194	12092	2.83318	1	0.354978	46.0119
GOTERM_MF_FAT	GO:0008081	phosphoric diester hydrolase activity	4	1.86916	0.0367698	PLCB3, GNAQ, PDE9A, PDE10A	147	60	11963	5.4254	0.999998	0.356487	40.1316
GOTERM_BP_FAT	GO:0009063	cellular amino acid catabolic process	4	1.86916	0.0369568	AMDHD1, NOS1, PADI3, HAL	154	58	12092	5.41514	1	0.354319	46.213
GOTERM_MF_FAT	GO:0005516	calmodulin binding	5	2.33645	0.0383542	NOS1, CAMK4, TRPV1, CAMK2A, DAPK1	147	104	11963	3.91255	0.999999	0.359393	41.4662
GOTERM_BP_FAT	GO:0050433	regulation of catecholamine secretion	3	1.40187	0.0394549	DRD2, CARTPT, CHRNA6	154	25	12092	9.42234	1	0.371084	48.4651
GOTERM_BP_FAT	GO:0002027	regulation of heart rate	3	1.40187	0.0394549	CALCA, DRD2, TAC1	154	25	12092	9.42234	1	0.371084	48.4651
GOTERM_MF_FAT	GO:0001653	peptide receptor activity	5	2.33645	0.0395088	SSTR1, OPRK1, GALR2, NPY1R, NPY5R	147	105	11963	3.87528	0.999999	0.358968	42.4213
GOTERM_MF_FAT	GO:0008528	peptide receptor activity, G-protein coupled	5	2.33645	0.0395088	SSTR1, OPRK1, GALR2, NPY1R, NPY5R	147	105	11963	3.87528	0.999999	0.358968	42.4213
GOTERM_BP_FAT	GO:0033674	positive regulation of kinase activity	7	3.27103	0.0407764	CALCA, DRD2, ADCY5, CARTPT, LPAR3, DGKZ, DGKI	154	199	12092	2.76199	1	0.378542	49.6204
GOTERM_CC_FAT	GO:0012506	vesicle membrane	6	2.80374	0.0414452	SYNPR, DRD2, SYT9, VGF, RAB27B, CAMK2A	149	138	10776	3.14444	0.999635	0.213264	40.8268
GOTERM_BP_FAT	GO:0009968	negative regulation of signal transduction	7	3.27103	0.0416164	DRD2, RGS4, RGS7, DGKZ, ADRBK2, INPP5D, RGS14	154	200	12092	2.74818	1	0.382297	50.342
GOTERM_BP_FAT	GO:0002791	regulation of peptide secretion	4	1.86916	0.0419535	NOS1, DRD2, NNAT, SYT9	154	61	12092	5.14882	1	0.38234	50.6288
GOTERM_BP_FAT	GO:0009611	response to wounding	11	5.14019	0.0429532	INA, CALCA, PTGER3, TRPV1, DRD2, C6, CRH, TAC1, DSP, MSTN, GAL	154	424	12092	2.03706	1	0.387132	51.4704
GOTERM_BP_FAT	GO:0007588	excretion	3	1.40187	0.0454148	PTGER3, TRPV1, DRD2	154	27	12092	8.72439	1	0.402029	53.4856
GOTERM_BP_FAT	GO:0050905	neuromuscular process	4	1.86916	0.0454636	DRD2, ADCY5, TCF15, FOXS1	154	63	12092	4.98536	1	0.39994	53.5248
GOTERM_BP_FAT	GO:0003013	circulatory system process	6	2.80374	0.0469147	CALCA, NOS1, DRD2, TAC1, CARTPT, NPY1R	154	155	12092	3.03946	1	0.407441	54.6747
GOTERM_BP_FAT	GO:0008015	blood circulation	6	2.80374	0.0469147	CALCA, NOS1, DRD2, TAC1, CARTPT, NPY1R	154	155	12092	3.03946	1	0.407441	54.6747
GOTERM_BP_FAT	GO:0008016	regulation of heart contraction	4	1.86916	0.0472718	CALCA, NOS1, DRD2, TAC1	154	64	12092	4.90747	1	0.407436	54.9535
GOTERM_MF_FAT	GO:0001601	peptide YY receptor activity	2	0.934579	0.0479367	NPY1R, NPY5R	147	4	11963	40.6905	1	0.408726	48.9675
GOTERM_BP_FAT	GO:0051347	positive regulation of transferase activity	7	3.27103	0.0487309	CALCA, DRD2, ADCY5, CARTPT, LPAR3, DGKZ, DGKI	154	208	12092	2.64248	1	0.414744	56.0762
GOTERM_BP_FAT	GO:0045760	positive regulation of action potential	2	0.934579	0.0496655	TAC1, KCNIP1	154	4	12092	39.2597	1	0.418461	56.7816
GOTERM_BP_FAT	GO:0060158	activation of phospholipase C activity by dopamine receptor signaling pathway	2	0.934579	0.0496655	GNAQ, DRD2	154	4	12092	39.2597	1	0.418461	56.7816
GOTERM_BP_FAT	GO:0007195	inhibition of adenylate cyclase activity by dopamine receptor signaling pathway	2	0.934579	0.0496655	DRD2, ADCY5	154	4	12092	39.2597	1	0.418461	56.7816
GOTERM_BP_FAT	GO:0009310	amine catabolic process	4	1.86916	0.0509929	AMDHD1, NOS1, PADI3, HAL	154	66	12092	4.75876	1	0.424624	57.7651
GOTERM_CC_FAT	GO:0005834	heterotrimeric G-protein complex	3	1.40187	0.0525741	GNAQ, RGS7, GNB4	149	27	10776	8.03579	0.999959	0.256983	48.8016
GOTERM_BP_FAT	GO:0042755	eating behavior	3	1.40187	0.0549255	IAPP, TCF15, NPY5R	154	30	12092	7.85195	1	0.446835	60.5567
GOTERM_BP_FAT	GO:0045859	regulation of protein kinase activity	8	3.73832	0.0566364	CALCA, DRD2, ADCY5, CARTPT, LPAR3, DGKZ, PKIB, DGKI	154	271	12092	2.31792	1	0.454761	61.7163
GOTERM_BP_FAT	GO:0006954	inflammatory response	7	3.27103	0.0575832	CALCA, PTGER3, TRPV1, C6, CRH, TAC1, GAL	154	217	12092	2.53289	1	0.457955	62.3441
GOTERM_BP_FAT	GO:0044271	nitrogen compound biosynthetic process	9	4.20561	0.0576235	NOS1, ADCY5, PADI3, SLC5A7, ASL, HPRT1, NT5E, TPH2, ATP13A4	154	329	12092	2.14795	1	0.455748	62.3707
GOTERM_BP_FAT	GO:0003014	renal system process	3	1.40187	0.0582385	PTGER3, TRPV1, DRD2	154	31	12092	7.59866	1	0.456944	62.773
GOTERM_BP_FAT	GO:0009409	response to cold	3	1.40187	0.0582385	P2RX3, PCSK1N, VGF	154	31	12092	7.59866	1	0.456944	62.773
GOTERM_BP_FAT	GO:0045776	negative regulation of blood pressure	3	1.40187	0.0582385	CALCA, NOS1, DRD2	154	31	12092	7.59866	1	0.456944	62.773
GOTERM_BP_FAT	GO:0031175	neuron projection development	8	3.73832	0.0584588	DRD2, GALR2, DPYSL3, EFNA5, LMX1A, HPRT1, KLHL1, GFRA3	154	273	12092	2.30094	1	0.455824	62.9162
GOTERM_MF_FAT	GO:0031013	troponin I binding	2	0.934579	0.0595598	TNNI3K, RCAN3	147	5	11963	32.5524	1	0.471415	56.8686
GOTERM_BP_FAT	GO:0032922	circadian regulation of gene expression	2	0.934579	0.0616941	DRD2, CARTPT	154	5	12092	31.4078	1	0.471982	64.9597
GOTERM_MF_FAT	GO:0016597	amino acid binding	4	1.86916	0.0637071	NOS1, GRIK1, DDAH1, TPH2	147	75	11963	4.34032	1	0.485166	59.4017
GOTERM_BP_FAT	GO:0021954	central nervous system neuron development	3	1.40187	0.0650649	GNAQ, DRD2, HPRT1	154	33	12092	7.13813	1	0.48824	66.9762
GOTERM_BP_FAT	GO:0007167	enzyme linked receptor protein signaling pathway	8	3.73832	0.0651215	EPHA5, BEX1, ROR2, MSTN, PTPRT, ALK, GFRA2, ADCYAP1	154	280	12092	2.24341	1	0.48611	67.0091
GOTERM_MF_FAT	GO:0008144	drug binding	4	1.86916	0.0657556	GRIK1, DRD2, PDE10A, CHRNA6	147	76	11963	4.28321	1	0.486726	60.6013
GOTERM_BP_FAT	GO:0051048	negative regulation of secretion	4	1.86916	0.0672356	NOS1, DRD2, NPY1R, NPY5R	154	74	12092	4.2443	1	0.495043	68.2164
GOTERM_BP_FAT	GO:0043549	regulation of kinase activity	8	3.73832	0.0701526	CALCA, DRD2, ADCY5, CARTPT, LPAR3, DGKZ, PKIB, DGKI	154	285	12092	2.20406	1	0.507882	69.8142
GOTERM_CC_FAT	GO:0030667	secretory granule membrane	3	1.40187	0.0710933	SYT9, VGF, RAB27B	149	32	10776	6.7802	0.999999	0.325659	59.9148
GOTERM_BP_FAT	GO:0014832	urinary bladder smooth muscle contraction	2	0.934579	0.0735714	TRPV1, P2RX3	154	6	12092	26.1732	1	0.522777	71.5909
GOTERM_BP_FAT	GO:0006527	arginine catabolic process	2	0.934579	0.0735714	NOS1, PADI3	154	6	12092	26.1732	1	0.522777	71.5909
GOTERM_BP_FAT	GO:0014848	urinary tract smooth muscle contraction	2	0.934579	0.0735714	TRPV1, P2RX3	154	6	12092	26.1732	1	0.522777	71.5909
GOTERM_BP_FAT	GO:0030146	diuresis	2	0.934579	0.0735714	PTGER3, DRD2	154	6	12092	26.1732	1	0.522777	71.5909
GOTERM_BP_FAT	GO:0001660	fever	2	0.934579	0.0735714	PTGER3, TRPV1	154	6	12092	26.1732	1	0.522777	71.5909
GOTERM_BP_FAT	GO:0051481	reduction of cytosolic calcium ion concentration	2	0.934579	0.0735714	DRD2, NPY1R	154	6	12092	26.1732	1	0.522777	71.5909
GOTERM_BP_FAT	GO:0046888	negative regulation of hormone secretion	3	1.40187	0.0757733	NOS1, DRD2, NPY1R	154	36	12092	6.54329	1	0.531185	72.6827
GOTERM_BP_FAT	GO:0043086	negative regulation of catalytic activity	7	3.27103	0.0767843	NOS1, IL7, DRD2, ADCY5, PKIB, RGD1560723, NQO1	154	234	12092	2.34887	1	0.533645	73.1706
GOTERM_BP_FAT	GO:0007270	nerve-nerve synaptic transmission	3	1.40187	0.0794594	GRIK1, CAMK4, DRD2	154	37	12092	6.36644	1	0.543943	74.4225
GOTERM_BP_FAT	GO:0050727	regulation of inflammatory response	4	1.86916	0.0807733	CALCA, TAC1, NT5E, NPY5R	154	80	12092	3.92597	1	0.547644	75.0171
GOTERM_MF_FAT	GO:0047555	3',5'-cyclic-GMP phosphodiesterase activity	2	0.934579	0.082385	PDE9A, PDE10A	147	7	11963	23.2517	1	0.559687	69.1917
GOTERM_BP_FAT	GO:0007186	G-protein coupled receptor protein signaling pathway	34	15.8879	0.082536	GNA14, DRD2, GRIK3, ADCY5, OPRK1, LPAR3, TAC1, GPR68, ADCYAP1, CALCA, PTGIR, GPR27, IAPP, GALR2, NSG1, RAMP3, PTGER3, RXFP1, MRGPRD, DGKI, NPY1R, GAL, KCNK2, NPY5R, GPR35, GNAQ, SSTR1, PTGDR, CRH, CARTPT, RGS7, DGKZ, GNB4, PCSK1N	154	2055	12092	1.29911	1	0.553322	75.7945
GOTERM_BP_FAT	GO:0032229	negative regulation of synaptic transmission, GABAergic	2	0.934579	0.0852993	GRIK1, NPY5R	154	7	12092	22.4341	1	0.56333	76.9675
GOTERM_BP_FAT	GO:0032230	positive regulation of synaptic transmission, GABAergic	2	0.934579	0.0852993	GRIK1, TAC1	154	7	12092	22.4341	1	0.56333	76.9675
GOTERM_BP_FAT	GO:0018198	peptidyl-cysteine modification	2	0.934579	0.0852993	RAB3B, NOS1	154	7	12092	22.4341	1	0.56333	76.9675
GOTERM_BP_FAT	GO:0050951	sensory perception of temperature stimulus	2	0.934579	0.0852993	CALCA, TRPV1	154	7	12092	22.4341	1	0.56333	76.9675
GOTERM_BP_FAT	GO:0003091	renal water homeostasis	2	0.934579	0.0852993	PTGER3, DRD2	154	7	12092	22.4341	1	0.56333	76.9675
GOTERM_BP_FAT	GO:0051338	regulation of transferase activity	8	3.73832	0.0854478	CALCA, DRD2, ADCY5, CARTPT, LPAR3, DGKZ, PKIB, DGKI	154	299	12092	2.10086	1	0.561585	77.029
GOTERM_CC_FAT	GO:0044433	cytoplasmic vesicle part	6	2.80374	0.086535	SYNPR, DRD2, SYT9, VGF, RAB27B, CAMK2A	149	171	10776	2.53762	1	0.375092	67.4358
GOTERM_BP_FAT	GO:0000904	cell morphogenesis involved in differentiation	7	3.27103	0.0869396	DRD2, DPYSL3, EFNA5, LMX1A, HPRT1, HNRNPAB, GFRA3	154	242	12092	2.27122	1	0.565751	77.6384
GOTERM_BP_FAT	GO:0051971	positive regulation of transmission of nerve impulse	3	1.40187	0.0869944	GRIK1, TAC1, CARTPT	154	39	12092	6.03996	1	0.563616	77.6604
GOTERM_BP_FAT	GO:0030030	cell projection organization	9	4.20561	0.0877903	DRD2, GALR2, LPAR3, DPYSL3, EFNA5, LMX1A, HPRT1, KLHL1, GFRA3	154	361	12092	1.95755	1	0.56471	77.979
GOTERM_CC_FAT	GO:0042383	sarcolemma	4	1.86916	0.0919245	KCNJ5, CACNA2D1, NOS1, ADCY5	149	78	10776	3.70883	1	0.385748	69.739
GOTERM_MF_FAT	GO:0016840	carbon-nitrogen lyase activity	2	0.934579	0.0935904	HAL, ASL	147	8	11963	20.3452	1	0.59861	73.9627
GOTERM_MF_FAT	GO:0004955	prostaglandin receptor activity	2	0.934579	0.0935904	PTGER3, PTGDR	147	8	11963	20.3452	1	0.59861	73.9627
GOTERM_BP_FAT	GO:0031646	positive regulation of neurological system process	3	1.40187	0.0947337	GRIK1, TAC1, CARTPT	154	41	12092	5.74533	1	0.59143	80.5826
GOTERM_BP_FAT	GO:0009077	histidine family amino acid catabolic process	2	0.934579	0.0968797	AMDHD1, HAL	154	8	12092	19.6299	1	0.597702	81.3269
GOTERM_BP_FAT	GO:0006548	histidine catabolic process	2	0.934579	0.0968797	AMDHD1, HAL	154	8	12092	19.6299	1	0.597702	81.3269
GOTERM_BP_FAT	GO:0043267	negative regulation of potassium ion transport	2	0.934579	0.0968797	NOS1, GNAQ	154	8	12092	19.6299	1	0.597702	81.3269
GOTERM_BP_FAT	GO:0050891	multicellular organismal water homeostasis	2	0.934579	0.0968797	PTGER3, DRD2	154	8	12092	19.6299	1	0.597702	81.3269

## Sheet: S7 TRPV1(+) Kegg 
Category	Term	Description	Count	%	PValue	Genes	List Total	Pop Hits	Pop Total	Fold Enrichment	Bonferroni	Benjamini	FDR
KEGG_PATHWAY	rno04080	Neuroactive ligand-receptor interaction	16	7.47664	5.48995e-07	PTGER3, GRIK1, RXFP1, DRD2, TRPV1, GRIK3, OPRK1, LPAR3, NPY1R, NPY5R, PTGIR, GPR35, SSTR1, P2RX3, GALR2, PTGDR	71	262	5590	4.80809	3.89779e-05	3.89779e-05	0.00056981
KEGG_PATHWAY	rno04020	Calcium signaling pathway	9	4.20561	0.00181809	GNA14, PLCB3, NOS1, PTGER3, GNAQ, CAMK4, P2RX3, CACNA1E, CAMK2A	71	182	5590	3.89336	0.121203	0.0625585	1.87102
KEGG_PATHWAY	rno04270	Vascular smooth muscle contraction	7	3.27103	0.00273608	RAMP3, PLCB3, PTGIR, GNAQ, ADCY5, MYL6L, KCNMB2	71	113	5590	4.87723	0.176777	0.0627851	2.80366
KEGG_PATHWAY	rno04070	Phosphatidylinositol signaling system	5	2.33645	0.011114	CDS2, PLCB3, DGKZ, DGKI, INPP5D	71	70	5590	5.62374	0.547745	0.17994	10.9524
KEGG_PATHWAY	rno00230	Purine metabolism	7	3.27103	0.0121819	XDH, POLR2L, ADCY5, PDE9A, PDE10A, HPRT1, NT5E	71	154	5590	3.57875	0.581144	0.159741	11.9455
KEGG_PATHWAY	rno04720	Long-term potentiation	4	1.86916	0.0510099	PLCB3, GNAQ, CAMK4, CAMK2A	71	67	5590	4.70044	0.975702	0.461817	41.9243
KEGG_PATHWAY	rno04730	Long-term depression	4	1.86916	0.0510099	PLCB3, NOS1, GNAQ, CRH	71	67	5590	4.70044	0.975702	0.461817	41.9243
KEGG_PATHWAY	rno04540	Gap junction	4	1.86916	0.080429	PLCB3, GNAQ, DRD2, ADCY5	71	81	5590	3.88802	0.997403	0.572781	58.1163

## Sheet: S7 TRPV1(+) Interpro
Category	Term	Description	Count	%	PValue	Genes	List Total	Pop Hits	Pop Total	Fold Enrichment	Bonferroni	Benjamini	FDR
INTERPRO	IPR000276	7TM GPCR, rhodopsin-like	14	6.54206	0.00300214	PTGER3, RXFP1, DRD2, OPRK1, MRGPRD, LPAR3, NPY1R, NPY5R, PTGIR, GPR35, SSTR1, GPR27, GALR2, PTGDR	162	344	10240	2.57249	0.687633	0.687633	4.08764
INTERPRO	IPR005821	Ion transport	7	3.27103	0.00322382	TRPC4, KCNC4, TRPV1, KCNH6, KCNA3, CACNA1E, SCN11A	162	92	10240	4.80945	0.71339	0.46464	4.38324
INTERPRO	IPR008365	Prostanoid receptor	3	1.40187	0.00646415	PTGIR, PTGER3, PTGDR	162	8	10240	23.7037	0.918711	0.566811	8.60871
INTERPRO	IPR000342	Regulator of G protein signalling	4	1.86916	0.00936698	RGS4, RGS7, ADRBK2, RGS14	162	28	10240	9.02998	0.973803	0.597688	12.2463
INTERPRO	IPR018248	EF hand	6	2.80374	0.0107928	SCGN, S100A6, KCNIP2, KCNIP1, KCNIP4, MYL6L	162	85	10240	4.46187	0.984997	0.568249	13.9834
INTERPRO	IPR017452	GPCR, rhodopsin-like superfamily	14	6.54206	0.0156205	PTGER3, RXFP1, DRD2, OPRK1, MRGPRD, LPAR3, NPY1R, NPY5R, PTGIR, GPR35, SSTR1, GPR27, GALR2, PTGDR	162	422	10240	2.09701	0.997741	0.637769	19.6308
INTERPRO	IPR018249	EF-HAND 2	7	3.27103	0.0171886	SCGN, S100A6, CACNA1E, KCNIP2, KCNIP1, KCNIP4, MYL6L	162	131	10240	3.37763	0.998781	0.616549	21.3898
INTERPRO	IPR011992	EF-Hand type	7	3.27103	0.0223191	SCGN, PLCB3, S100A6, KCNIP2, KCNIP1, KCNIP4, MYL6L	162	139	10240	3.18323	0.999839	0.664428	26.8985
INTERPRO	IPR001125	Recoverin	3	1.40187	0.0225559	KCNIP2, KCNIP1, KCNIP4	162	15	10240	12.642	0.999854	0.625068	27.1438
INTERPRO	IPR013099	Ion transport 2	3	1.40187	0.0318744	KCNT1, KCNK18, KCNK2	162	18	10240	10.535	0.999996	0.714532	36.215
INTERPRO	IPR002110	Ankyrin	6	2.80374	0.0348429	TRPC4, TRPV1, TNNI3K, DGKZ, DGKI, DAPK1	162	115	10240	3.29791	0.999999	0.712836	38.8769
INTERPRO	IPR018360	Calcitonin, conserved site	2	0.934579	0.0464347	CALCA, IAPP	162	3	10240	42.1399	1	0.7842	48.3151
INTERPRO	IPR001693	Calcitonin-like	2	0.934579	0.0464347	CALCA, IAPP	162	3	10240	42.1399	1	0.7842	48.3151
INTERPRO	IPR018247	EF-HAND 1	6	2.80374	0.0512165	SCGN, TRPC4, S100A6, KCNIP2, KCNIP1, KCNIP4	162	128	10240	2.96296	1	0.790934	51.7989
INTERPRO	IPR000372	Leucine-rich repeat, cysteine-rich flanking region, N-terminal	4	1.86916	0.0577522	AMIGO2, LRRC3, RXFP1, LRRC55	162	56	10240	4.51499	1	0.80687	56.2088
INTERPRO	IPR000654	G-protein alpha subunit, group Q	2	0.934579	0.0614317	GNA14, GNAQ	162	4	10240	31.6049	1	0.805186	58.5237
INTERPRO	IPR016017	GDNF/GAS1	2	0.934579	0.0614317	GFRA2, GFRA3	162	4	10240	31.6049	1	0.805186	58.5237
INTERPRO	IPR003438	Glial cell line-derived neurotrophic factor receptor	2	0.934579	0.0614317	GFRA2, GFRA3	162	4	10240	31.6049	1	0.805186	58.5237
INTERPRO	IPR002048	Calcium-binding EF-hand	5	2.33645	0.0624807	SCGN, KCNIP2, KCNIP1, KCNIP4, MYL6L	162	95	10240	3.32684	1	0.789975	59.1626
INTERPRO	IPR000756	Diacylglycerol kinase accessory region	2	0.934579	0.090726	DGKZ, DGKI	162	6	10240	21.07	1	0.885264	73.2919
INTERPRO	IPR011778	D-hydantoinase	2	0.934579	0.090726	DPYSL4, DPYSL3	162	6	10240	21.07	1	0.885264	73.2919
INTERPRO	IPR003591	Leucine-rich repeat, typical subtype	4	1.86916	0.0913738	AMIGO2, LRRC3, RXFP1, LRRC2	162	68	10240	3.71823	1	0.872567	73.5548
INTERPRO	IPR001611	Leucine-rich repeat	5	2.33645	0.0998934	AMIGO2, LRRC3, RXFP1, LRRC2, LRRC55	162	112	10240	2.82187	1	0.88277	76.7964

## Sheet: S7 TRPV1(-) GO
Category	Term	Description	Count	%	PValue	Genes	List Total	Pop Hits	Pop Total	Fold Enrichment	Bonferroni	Benjamini	FDR
GOTERM_BP_FAT	GO:0001568	blood vessel development	26	31.3253	2.11123e-09	ASPN, LTBP1, COL3A1, ELN, ACE, SCRG1, HPSE, COL12A1, LOX, TFPI2, CRIM1, FN1, COL15A1, PRELP, OMD, THBD, BGN, PTGDS, ITGA5, SFRP4, PDGFRL, PON2, COL1A1, CP, PRSS23, PLAU	59	1281	10776	3.70706	3.37796e-07	3.37796e-07	2.54928e-06
GOTERM_BP_FAT	GO:0001944	vasculature development	12	14.4578	1.96198e-08	ASPN, OMD, LTBP1, BGN, COL3A1, ELN, COL15A1, COL12A1, COL1A1, LOX, FN1, PRELP	59	220	10776	9.9624	3.13917e-06	1.56959e-06	2.36907e-05
GOTERM_BP_FAT	GO:0042060	wound healing	12	14.4578	7.92924e-08	ASPN, OMD, LTBP1, BGN, COL3A1, ELN, COL15A1, COL12A1, COL1A1, LOX, FN1, PRELP	59	252	10776	8.69734	1.26867e-05	4.22892e-06	9.57446e-05
GOTERM_BP_FAT	GO:0009611	response to wounding	17	20.4819	4.51325e-07	ASPN, LTBP1, ELN, COL3A1, COL15A1, PRELP, OMD, ACE, BGN, THBD, PTGDS, ITGA5, COL12A1, CP, LOX, COL1A1, FN1	59	693	10776	4.48045	7.22094e-05	1.80528e-05	0.000544968
GOTERM_BP_FAT	GO:0022610	biological adhesion	26	31.3253	4.70158e-07	LTBP1, ADORA2B, GALNT7, PTGS2, COL3A1, ELN, HS3ST1, GJA1, COL12A1, HTR1D, FN1, ITGA1, PRELP, OMD, BGN, PTGDS, CHRM3, BACE2, PDGFRL, SFRP4, PON2, CP, PRSS23, PLAU, OPRD1, AOC3	61	1340	8979	2.85606	6.58199e-05	6.58199e-05	0.000554738
GOTERM_BP_FAT	GO:0007155	cell adhesion	31	37.3494	1.18623e-06	LTBP1, PTGS2, ADORA2B, HS3ST1, COL3A1, ANPEP, ACE, HPSE, SCRG1, COL12A1, LOX, HTR1D, PPAP2B, FN1, MRGPRB4, ITGA1, PRELP, OMD, BGN, CHRM3, PTGDS, BACE2, SFRP4, PDGFRL, PON2, CP, COL1A1, PRSS23, PLAU, OPRD1, AOC3	61	1949	8979	2.34125	0.000166059	8.3033e-05	0.00139963
GOTERM_BP_FAT	GO:0030198	extracellular matrix organization	19	22.8916	1.37544e-06	LTBP1, ELN, COL3A1, PRELP, OMD, ACE, BGN, PTGDS, HPSE, SCRG1, PDGFRL, SFRP4, COL12A1, CP, LOX, COL1A1, PRSS23, PLAU, FN1	61	765	8979	3.65587	0.000192544	6.41853e-05	0.00162287
GOTERM_BP_FAT	GO:0021700	developmental maturation	8	9.63855	1.86746e-06	OMD, BGN, COL3A1, ELN, COL12A1, COL1A1, FN1, PRELP	61	89	8979	13.2312	0.000261411	6.53591e-05	0.0022034
GOTERM_BP_FAT	GO:0010033	response to organic substance	25	30.1205	2.11236e-06	LTBP1, ADORA2B, GALNT7, PTGS2, COL3A1, ELN, HS3ST1, GJA1, HTR1D, FN1, ITGA1, PRELP, OMD, BGN, PTGDS, CHRM3, BACE2, PDGFRL, SFRP4, PON2, CP, PRSS23, PLAU, OPRD1, AOC3	54	1272	7317	2.66313	0.000618732	0.000618732	0.00281255
GOTERM_BP_FAT	GO:0043062	extracellular structure organization	10	12.0482	2.35351e-06	BGN, COL3A1, ELN, GJA1, ANPEP, COL1A1, LOX, PPAP2B, PLAU, CDH5	63	230	12092	8.34507	0.00174008	0.00174008	0.00357558
GOTERM_BP_FAT	GO:0030199	collagen fibril organization	10	12.0482	3.01195e-06	BGN, COL3A1, ELN, GJA1, ANPEP, COL1A1, LOX, PPAP2B, PLAU, CDH5	63	237	12092	8.09859	0.00222637	0.0011138	0.0045759
GOTERM_BP_FAT	GO:0018149	peptide cross-linking	25	30.1205	1.75168e-05	LTBP1, PTGS2, COL3A1, ELN, HS3ST1, ACE, SCRG1, HPSE, LOX, TFPI2, FN1, ITGA1, LHFP, PRELP, OMD, BGN, PTGDS, BACE2, SFRP4, PDGFRL, PON2, CP, COL1A1, PRSS23, PLAU	61	1517	8979	2.42579	0.00244937	0.000490355	0.0206662
GOTERM_BP_FAT	GO:0008015	blood circulation	5	6.0241	2.06972e-05	COL3A1, ELN, COL12A1, COL1A1, FN1	59	34	11963	29.818	0.00406909	0.00406909	0.0258745
GOTERM_BP_FAT	GO:0003013	circulatory system process	8	9.63855	2.85931e-05	THBD, ITGA5, COL3A1, GJA1, LOX, TFPI2, PLAU, FN1	63	174	12092	8.82467	0.0209369	0.00702824	0.043432
GOTERM_BP_FAT	GO:0034329	cell junction assembly	28	33.7349	4.15022e-05	LTBP1, ADORA2B, PTGS2, HS3ST1, ANPEP, ACE, HPSE, SCRG1, LOX, HTR1D, PPAP2B, FN1, MRGPRB4, ITGA1, PRELP, OMD, BGN, CHRM3, PTGDS, BACE2, SFRP4, PDGFRL, PON2, CP, COL1A1, PRSS23, OPRD1, AOC3	54	1831	7317	2.07209	0.0120868	0.00606175	0.0552456
GOTERM_BP_FAT	GO:0048514	blood vessel morphogenesis	25	30.1205	4.80907e-05	LTBP1, PTGS2, COL3A1, ELN, HS3ST1, ACE, SCRG1, HPSE, LOX, TFPI2, FN1, ITGA1, LHFP, PRELP, OMD, BGN, PTGDS, BACE2, SFRP4, PDGFRL, PON2, CP, COL1A1, PRSS23, PLAU	54	1516	7317	2.2345	0.0139921	0.00468595	0.0640133
GOTERM_BP_FAT	GO:0006940	regulation of smooth muscle contraction	11	13.253	5.30454e-05	CIITA, CEBPA, THBD, PTGS2, ITGA5, COL3A1, GJA1, LOX, TFPI2, PLAU, FN1	63	424	12092	4.97948	0.0384942	0.00976567	0.0805604
GOTERM_BP_FAT	GO:0034330	cell junction organization	5	6.0241	5.63314e-05	LTBP1, COL3A1, ELN, COL12A1, COL1A1	61	32	8979	22.9995	0.0078556	0.00131357	0.0664452
GOTERM_BP_FAT	GO:0007229	integrin-mediated signaling pathway	13	15.6627	7.3375e-05	LTBP1, S100A16, GALNT7, ITGA1, CDH5, MYL9, ITPR2, THBD, S100B, PVALB, FBLN2, HPSE, AOC3	59	672	11963	3.92249	0.0143514	0.00720165	0.0917016
GOTERM_BP_FAT	GO:0034097	response to cytokine stimulus	11	13.253	0.000110471	OMD, ITGA5, COL3A1, COL15A1, ITGA1, COL12A1, CLEC7A, PXN, CDH5, FN1, AOC3	63	463	12092	4.56005	0.0785007	0.0162177	0.167705
GOTERM_BP_FAT	GO:0001503	ossification	11	13.253	0.000110471	OMD, ITGA5, COL3A1, COL15A1, ITGA1, COL12A1, CLEC7A, PXN, CDH5, FN1, AOC3	63	463	12092	4.56005	0.0785007	0.0162177	0.167705
GOTERM_BP_FAT	GO:0048251	elastic fiber assembly	6	7.22892	0.000167379	COL3A1, COL15A1, COL12A1, COL1A1, LOX, FN1	59	97	10776	11.2976	0.0264274	0.00534226	0.201921
GOTERM_BP_FAT	GO:0032964	collagen biosynthetic process	4	4.81928	0.000183716	COL3A1, COL12A1, COL1A1, LOX	59	21	10776	34.7893	0.0289694	0.00488757	0.22161
GOTERM_BP_FAT	GO:0007610	behavior	11	13.253	0.000701035	S100A16, S100B, GALNT7, FBLN2, HPSE, PVALB, ITGA1, PON2, AOC3, ITPR2, MYL9	61	449	8979	3.60616	0.0935137	0.0139277	0.824028
GOTERM_BP_FAT	GO:0060348	bone development	25	30.1205	0.000819351	ADORA2B, PTGS2, GJA1, RPE65, PXN, CDH5, ACE, HTR1D, FN1, NTNG1, ITGA1, RND3, THBD, BGN, CHRM3, PKP1, ITGA5, RGS6, PON2, CP, CLEC7A, COL1A1, PLAU, OPRD1, AOC3	59	2396	10776	1.90572	0.122914	0.0185613	0.98488
GOTERM_BP_FAT	GO:0031960	response to corticosteroid stimulus	5	6.0241	0.00105905	COL3A1, ELN, COL1A1, LOX, FN1	63	88	12092	10.9055	0.543477	0.122507	1.59696
GOTERM_BP_FAT	GO:0007613	memory	7	8.43373	0.0020811	ITGA5, COL3A1, ITGA1, COL1A1, PXN, FN1, MYL9	40	195	5590	5.01667	0.100797	0.100797	1.99518
GOTERM_BP_FAT	GO:0007160	cell-matrix adhesion	5	6.0241	0.00218008	CEBPA, PTGS2, GJA1, RUNX2, CDH5	63	107	12092	8.969	0.801114	0.206036	3.2614
GOTERM_BP_FAT	GO:0016477	cell migration	5	6.0241	0.00228907	ITGA5, COL3A1, ITGA1, COL1A1, FN1	40	81	5590	8.62654	0.110305	0.0567635	2.19258
GOTERM_BP_FAT	GO:0006937	regulation of muscle contraction	13	15.6627	0.00233741	CEBPA, CIITA, PTGS2, MCL1, ACTA2, COL3A1, GJA1, RPE65, THBD, PTGDS, LOX, COL1A1, CLEC7A	63	928	12092	2.68877	0.823018	0.194638	3.49287
GOTERM_BP_FAT	GO:0009725	response to hormone stimulus	7	8.43373	0.00295226	CHRM3, ITGA5, ITGA1, NCKAP1L, PXN, FN1, MYL9	40	209	5590	4.68062	0.13997	0.0490203	2.81971
GOTERM_BP_FAT	GO:0001501	skeletal system development	6	7.22892	0.00309499	LTBP1, THBD, PTGS2, FBLN2, PLAU, FN1	62	167	10240	5.93394	0.389127	0.389127	3.66991
GOTERM_BP_FAT	GO:0031589	cell-substrate adhesion	4	4.81928	0.00445533	ASPN, OMD, BGN, PRELP	62	56	10240	11.7972	0.508346	0.29882	5.24353
GOTERM_BP_FAT	GO:0043403	skeletal muscle regeneration	5	6.0241	0.00481531	LTBP1, THBD, PTGS2, FBLN2, PLAU	62	115	10240	7.18093	0.535821	0.225725	5.65599
GOTERM_BP_FAT	GO:0006928	cell motion	5	6.0241	0.00543104	COL3A1, ELN, COL1A1, LOX, FN1	63	138	12092	6.95422	0.982224	0.360948	7.94072
GOTERM_BP_FAT	GO:0048545	response to steroid hormone stimulus	3	3.61446	0.00559352	COL3A1, COL1A1, LOX	63	22	12092	26.1732	0.984249	0.339714	8.16895
GOTERM_BP_FAT	GO:0046457	prostanoid biosynthetic process	3	3.61446	0.00645161	BGN, FBLN2, ELN	59	25	11963	24.3315	0.720593	0.346249	7.77375
GOTERM_BP_FAT	GO:0001516	prostaglandin biosynthetic process	3	3.61446	0.00663934	BGN, COL3A1, FN1	63	24	12092	23.9921	0.99277	0.361182	9.62535
GOTERM_BP_FAT	GO:0048469	cell maturation	5	6.0241	0.00682792	LTBP1, THBD, PTGS2, FBLN2, PLAU	62	127	10240	6.50241	0.663569	0.238405	7.93178
GOTERM_BP_FAT	GO:0009991	response to extracellular stimulus	6	7.22892	0.00686585	OMD, ITGA1, COL12A1, PXN, FN1, AOC3	61	180	8979	4.90656	0.618839	0.113582	7.80733
GOTERM_BP_FAT	GO:0009719	response to endogenous stimulus	4	4.81928	0.00699271	ASPN, OMD, BGN, PRELP	37	56	5083	9.81274	0.206713	0.206713	5.94123
GOTERM_BP_FAT	GO:0001958	endochondral ossification	5	6.0241	0.00814381	ACE, PTGS2, ADORA2B, ACTA2, ITGA1	63	155	12092	6.1915	0.997645	0.396046	11.6826
GOTERM_BP_FAT	GO:0044057	regulation of system process	5	6.0241	0.00814381	ACE, PTGS2, ADORA2B, ACTA2, ITGA1	63	155	12092	6.1915	0.997645	0.396046	11.6826
GOTERM_BP_FAT	GO:0006692	prostanoid metabolic process	3	3.61446	0.00897427	ITGA5, GJA1, FN1	63	28	12092	20.5646	0.998733	0.401393	12.7994
GOTERM_BP_FAT	GO:0006693	prostaglandin metabolic process	4	4.81928	0.00914573	LTBP1, COL3A1, COL1A1, CRIM1	59	89	11963	9.11293	0.836346	0.363964	10.8522
GOTERM_BP_FAT	GO:0051674	localization of cell	3	3.61446	0.0101515	OMD, ANPEP, FN1	61	23	8979	19.1996	0.760325	0.146764	11.3425
GOTERM_BP_FAT	GO:0048870	cell motility	3	3.61446	0.0110271	CP, LOX, AOC3	61	24	8979	18.3996	0.788255	0.143788	12.2635
GOTERM_BP_FAT	GO:0003012	muscle system process	3	3.61446	0.0117328	ITGA5, COL3A1, ITGA1	59	34	11963	17.8908	0.902219	0.371868	13.7191
GOTERM_BP_FAT	GO:0007044	cell-substrate junction assembly	5	6.0241	0.0117974	LTBP1, THBD, PTGS2, FBLN2, PLAU	37	127	5083	5.4086	0.324046	0.177836	9.84018
GOTERM_BP_FAT	GO:0007584	response to nutrient	2	2.40964	0.0144353	COL3A1, COL1A1	54	2	7317	135.5	0.985883	0.655304	17.6017
GOTERM_BP_FAT	GO:0060350	endochondral bone morphogenesis	5	6.0241	0.0151196	BGN, ELN, GJA1, ANPEP, PLAU	63	186	12092	5.15958	0.999987	0.553038	20.6628
GOTERM_BP_FAT	GO:0007565	female pregnancy	8	9.63855	0.0158953	ACE, THBD, PTGDS, ITGA5, COL3A1, CP, LOX, FN1	59	492	10776	2.96982	0.922979	0.274184	17.591
GOTERM_BP_FAT	GO:0008544	epidermis development	3	3.61446	0.0172536	OMD, BGN, PRELP	54	28	7317	14.5179	0.9939	0.639364	20.6844
GOTERM_CC_FAT	GO:0005576	extracellular region	2	2.40964	0.0177666	ASPN, BGN	62	3	10240	110.108	0.942172	0.434506	19.4447
GOTERM_CC_FAT	GO:0005578	proteinaceous extracellular matrix	3	3.61446	0.0178044	PTGS2, CHRM3, ADORA2B	63	40	12092	14.3952	0.999998	0.587806	23.8857
GOTERM_CC_FAT	GO:0031012	extracellular matrix	4	4.81928	0.0186244	BGN, CLEC7A, FN1, PRELP	59	116	11963	6.99182	0.975365	0.460584	20.9473
GOTERM_CC_FAT	GO:0044421	extracellular region part	4	4.81928	0.0186244	BGN, CLEC7A, FN1, PRELP	59	116	11963	6.99182	0.975365	0.460584	20.9473
GOTERM_CC_FAT	GO:0044420	extracellular matrix part	3	3.61446	0.0186563	ITGA5, GJA1, FN1	63	41	12092	14.0441	0.999999	0.58147	24.8827
GOTERM_CC_FAT	GO:0005581	collagen	3	3.61446	0.0193115	COL3A1, COL12A1, COL1A1	62	36	10240	13.7634	0.954976	0.40355	20.9597
GOTERM_CC_FAT	GO:0005886	plasma membrane	3	3.61446	0.0195253	ITGA5, COL3A1, ITGA1	63	42	12092	13.7098	1	0.576131	25.8868
GOTERM_CC_FAT	GO:0005615	extracellular space	4	4.81928	0.0196992	CIITA, PTGS2, MCL1, COL3A1	63	112	12092	6.85488	1	0.558659	26.0863
GOTERM_CC_FAT	GO:0044459	plasma membrane part	4	4.81928	0.0196992	PTGS2, COL1A1, RUNX2, FN1	63	112	12092	6.85488	1	0.558659	26.0863
GOTERM_CC_FAT	GO:0000267	cell fraction	2	2.40964	0.0199153	LOX, AOC3	61	3	8979	98.1311	0.940172	0.225878	21.1287
GOTERM_CC_FAT	GO:0009986	cell surface	4	4.81928	0.0202762	ACE, ITGA5, ACTA2, ITGA1	40	84	5590	6.65476	0.648208	0.229857	17.9768
GOTERM_CC_FAT	GO:0005626	insoluble fraction	2	2.40964	0.0203547	ELN, LOX	63	4	12092	95.9683	1	0.551094	26.8337
GOTERM_CC_FAT	GO:0009897	external side of plasma membrane	2	2.40964	0.0203547	COL3A1, COL1A1	63	4	12092	95.9683	1	0.551094	26.8337
GOTERM_CC_FAT	GO:0005583	fibrillar collagen	7	8.43373	0.0210947	PTGS2, PTGDS, S100B, ITGA5, ITGA1, PLAU, OPRD1	63	424	12092	3.16876	1	0.545634	27.6688
GOTERM_CC_FAT	GO:0005624	membrane fraction	3	3.61446	0.0222273	COL12A1, COL1A1, FN1	54	32	7317	12.7031	0.998621	0.666355	25.8658
GOTERM_MF_FAT	GO:0005201	extracellular matrix structural constituent	3	3.61446	0.0222273	OMD, BGN, PRELP	54	32	7317	12.7031	0.998621	0.666355	25.8658
GOTERM_MF_FAT	GO:0005509	calcium ion binding	5	6.0241	0.0224376	CIITA, CEBPA, ITGA5, COL3A1, ITGA1	59	222	11963	4.56673	0.988559	0.471995	24.7031
GOTERM_MF_FAT	GO:0050840	extracellular matrix binding	2	2.40964	0.0231756	ASPN, BGN	35	3	4368	83.2	0.635154	0.635154	19.6044
GOTERM_MF_FAT	GO:0019838	growth factor binding	22	26.506	0.0232747	LTBP1, S100A16, GALNT7, PTGS2, ITGA1, ANPEP, CDH5, PXN, ITPR2, MYL9, MAP3K6, ACE, THBD, S100B, HPSE, FBLN2, PVALB, CP, LOX, KLF2, AOC3, FN1	59	2854	11963	1.56299	0.990336	0.440054	25.5053
GOTERM_MF_FAT	GO:0005178	integrin binding	3	3.61446	0.0251754	PTGDS, COL1A1, FN1	61	37	8979	11.9349	0.971835	0.257307	25.9809
GOTERM_MF_FAT	GO:0001871	pattern binding	4	4.81928	0.0256753	PTGS2, COL1A1, RUNX2, FN1	63	124	12092	6.1915	1	0.600111	32.6438
GOTERM_MF_FAT	GO:0030247	polysaccharide binding	14	16.8675	0.0260576	PTGS2, ITGA1, NTNG1, GJA1, PXN, CDH5, RND3, ACE, CHRM3, ITGA5, RGS6, CLEC7A, CP, FN1	59	1358	10776	1.88293	0.985367	0.374616	27.299
GOTERM_MF_FAT	GO:0032403	protein complex binding	22	26.506	0.0268562	LTBP1, S100A16, GALNT7, PTGS2, ITGA1, ANPEP, CDH5, PXN, ITPR2, MYL9, MAP3K6, ACE, THBD, S100B, HPSE, FBLN2, PVALB, CP, LOX, KLF2, AOC3, FN1	59	2893	11963	1.54192	0.995313	0.448928	28.8495
GOTERM_MF_FAT	GO:0046872	metal ion binding	4	4.81928	0.028984	ASPN, OMD, BGN, PRELP	62	112	10240	5.89862	0.990689	0.487308	29.8665
GOTERM_MF_FAT	GO:0043169	cation binding	3	3.61446	0.0291117	COL3A1, COL12A1, COL1A1	61	40	8979	11.0398	0.984015	0.272517	29.4316
GOTERM_MF_FAT	GO:0043167	ion binding	4	4.81928	0.0295636	CEBPA, PTGS2, PTGDS, COL1A1	63	131	12092	5.86066	1	0.635565	36.6139
GOTERM_MF_FAT	GO:0048407	platelet-derived growth factor binding	3	3.61446	0.0305469	LTBP1, THBD, FBLN2	62	46	10240	10.7714	0.992793	0.460216	31.2161
GOTERM_MF_FAT	GO:0005507	copper ion binding	3	3.61446	0.030649	OMD, BGN, PRELP	54	38	7317	10.6974	0.999891	0.728271	33.9311
GOTERM_MF_FAT	GO:0030246	carbohydrate binding	2	2.40964	0.0307843	OMD, PRELP	35	4	4368	62.4	0.739338	0.489449	25.247
GOTERM_MF_FAT	GO:0016641	oxidoreductase activity, acting on the CH-NH2 group of donors, oxygen as acceptor	2	2.40964	0.0307843	COL3A1, COL1A1	35	4	4368	62.4	0.739338	0.489449	25.247
GOTERM_MF_FAT	GO:0005539	glycosaminoglycan binding	3	3.61446	0.0318636	ACTA2, PVALB, MYL9	61	42	8979	10.5141	0.989257	0.276621	31.7558

## Sheet: S7 TRPV1(-) Kegg
	Category	Term	Description	Count	%	PValue	Genes	List Total	Pop Hits	Pop Total	Fold Enrichment	Bonferroni	Benjamini	FDR
	KEGG_PATHWAY	rno04510	Focal adhesion	7	8.43373	0.0020811	ITGA5, COL3A1, ITGA1, COL1A1, PXN, FN1, MYL9	40	195	5590	5.01667	0.100797	0.100797	1.99518
	KEGG_PATHWAY	rno04512	ECM-receptor interaction	5	6.0241	0.00228907	ITGA5, COL3A1, ITGA1, COL1A1, FN1	40	81	5590	8.62654	0.110305	0.0567635	2.19258
	KEGG_PATHWAY	rno04810	Regulation of actin cytoskeleton	7	8.43373	0.00295226	CHRM3, ITGA5, ITGA1, NCKAP1L, PXN, FN1, MYL9	40	209	5590	4.68062	0.13997	0.0490203	2.81971
	KEGG_PATHWAY	rno05410	Hypertrophic cardiomyopathy (HCM)	4	4.81928	0.0202762	ACE, ITGA5, ACTA2, ITGA1	40	84	5590	6.65476	0.648208	0.229857	17.9768
	KEGG_PATHWAY	rno04270	Vascular smooth muscle contraction	4	4.81928	0.0434136	ADORA2B, ACTA2, ITPR2, MYL9	40	113	5590	4.9469	0.896024	0.364103	34.9082
	KEGG_PATHWAY	rno05412	Arrhythmogenic right ventricular cardiomyopathy (ARVC)	3	3.61446	0.0936381	ITGA5, ITGA1, GJA1	40	74	5590	5.66554	0.993357	0.566425	61.3689

## Sheet: S7 TRPV1(-) Interpro
Category	Term	Description	Count	%	PValue	Genes	List Total	Pop Hits	Pop Total	Fold Enrichment	Bonferroni	Benjamini	FDR
INTERPRO	IPR013032	EGF-like region, conserved site	6	7.22892	0.00309499	LTBP1, THBD, PTGS2, FBLN2, PLAU, FN1	62	167	10240	5.93394	0.389127	0.389127	3.66991
INTERPRO	IPR000372	Leucine-rich repeat, cysteine-rich flanking region, N-terminal	4	4.81928	0.00445533	ASPN, OMD, BGN, PRELP	62	56	10240	11.7972	0.508346	0.29882	5.24353
INTERPRO	IPR000742	EGF-like, type 3	5	6.0241	0.00481531	LTBP1, THBD, PTGS2, FBLN2, PLAU	62	115	10240	7.18093	0.535821	0.225725	5.65599
INTERPRO	IPR006210	EGF-like	5	6.0241	0.00682792	LTBP1, THBD, PTGS2, FBLN2, PLAU	62	127	10240	6.50241	0.663569	0.238405	7.93178
INTERPRO	IPR016352	Small leucine-rich proteoglycan, class I, decorin/asporin/byglycan	2	2.40964	0.0177666	ASPN, BGN	62	3	10240	110.108	0.942172	0.434506	19.4447
INTERPRO	IPR008160	Collagen triple helix repeat	3	3.61446	0.0193115	COL3A1, COL12A1, COL1A1	62	36	10240	13.7634	0.954976	0.40355	20.9597
INTERPRO	IPR001611	Leucine-rich repeat	4	4.81928	0.028984	ASPN, OMD, BGN, PRELP	62	112	10240	5.89862	0.990689	0.487308	29.8665
INTERPRO	IPR013091	EGF calcium-binding	3	3.61446	0.0305469	LTBP1, THBD, FBLN2	62	46	10240	10.7714	0.992793	0.460216	31.2161
INTERPRO	IPR018247	EF-HAND 1	4	4.81928	0.0406263	S100A16, S100B, PVALB, MYL9	62	128	10240	5.16129	0.998632	0.519399	39.363
INTERPRO	IPR018249	EF-HAND 2	4	4.81928	0.0430368	S100A16, S100B, PVALB, MYL9	62	131	10240	5.04309	0.999083	0.50314	41.1754
INTERPRO	IPR011992	EF-Hand type	4	4.81928	0.0498087	S100A16, S100B, PVALB, MYL9	62	139	10240	4.75284	0.999704	0.522175	46.0045
INTERPRO	IPR001881	EGF-like calcium-binding	3	3.61446	0.0510438	LTBP1, THBD, FBLN2	62	61	10240	8.12269	0.999759	0.500528	46.845
INTERPRO	IPR018097	EGF-like calcium-binding, conserved site	3	3.61446	0.0525477	LTBP1, THBD, FBLN2	62	62	10240	7.99168	0.999813	0.483253	47.8522
INTERPRO	IPR000152	EGF-type aspartate/asparagine hydroxylation conserved site	3	3.61446	0.0556026	LTBP1, THBD, FBLN2	62	64	10240	7.74194	0.999888	0.477809	49.8446
INTERPRO	IPR000885	Fibrillar collagen, C-terminal	2	2.40964	0.0580234	COL3A1, COL1A1	62	10	10240	33.0323	0.999925	0.469329	51.3735
INTERPRO	IPR013787	S100/CaBP-9k-type, calcium binding, subdomain	2	2.40964	0.0747753	S100A16, S100B	62	13	10240	25.4094	0.999996	0.538064	60.837
INTERPRO	IPR000326	Phosphatidic acid phosphatase type 2/haloperoxidase	2	2.40964	0.0802939	LPPR5, PPAP2B	62	14	10240	23.5945	0.999998	0.542899	63.5635
INTERPRO	IPR006209	EGF	3	3.61446	0.0820993	LTBP1, THBD, PTGS2	62	80	10240	6.19355	0.999999	0.530796	64.4169
INTERPRO	IPR018248	EF hand	3	3.61446	0.0910436	S100B, PVALB, MYL9	62	85	10240	5.82922	1	0.550147	68.381
INTERPRO	IPR000863	Sulfotransferase	2	2.40964	0.0966562	HS3ST1, SULT1D1	62	17	10240	19.4307	1	0.554311	70.6572
